# Supplementary material for: Modelling 2050 Water Retention Scenarios for Irrigated and Non-Irrigated Crops for Adaptation to Climate Change Using the SWAT Model: The Case of the Bystra Catchment, Poland
Source: MDPI journal article supplement (doi:10.3390/agronomy13020404), 2023-01-30
Supplement: s1 [file s1]

**Table S1.** Comparison of average soil water content by season between model SWAT 2010-2017 and V1, V2.1-V2.5 and V3.1-V3.5 for 2041–2050 in the Bystra catchment for climate projection RCP 4.5.1, RCP 4.5.2, RCP 4.5.3. Bold numbers indicate soil water content, and shaded numbers indicate percentage change (red indicates % decrease in content and blue indicates % increase in content). Dark red and dark blue shading indicates large changes, while light red and light blue shading indicates small changes (author’s own study).

| Time Interval    |                   | 2041-2050                                   |                |                   |                             |                                       |                                    |                |                   |                             |                                       |                                    |     |
|------------------|-------------------|---------------------------------------------|----------------|-------------------|-----------------------------|---------------------------------------|------------------------------------|----------------|-------------------|-----------------------------|---------------------------------------|------------------------------------|-----|
| Type of Scenario | Model 2010 - 2017 | Variant 2 - Low Retention                   |                |                   |                             |                                       | Variant 3 - Low Retention          |                |                   |                             |                                       |                                    |     |
|                  |                   | Variant 1 Only Climate Change (V1)          | More Ponds     |                   |                             |                                       | More Reservoirs                    |                |                   |                             |                                       |                                    |     |
|                  |                   |                                             | Cereals (V2.1) | Vegetables (V2.2) | Irrigated Vegetables (V2.3) | Irrigated Vegetables + Cereals (V2.4) | Irrigated Orchard + Cereals (V2.5) | Cereals (V3.1) | Vegetables (V3.2) | Irrigated Vegetables (V3.3) | Irrigated Vegetables + Cereals (V3.4) | Irrigated Orchard + Cereals (V3.5) |     |
| Season           |                   | Seasonal Average of Soil Water Content [mm] |                |                   |                             |                                       |                                    |                |                   |                             |                                       |                                    |     |
| Climate Scenario |                   | RCP 4.5.1 (RACMO22E)                        |                |                   |                             |                                       |                                    |                |                   |                             |                                       |                                    |     |
| DJF              | 344               | 332                                         | 332            | 332               | 333                         | 332                                   | 332                                | 332            | 332               | 332                         | 333                                   | 331                                | 297 |
|                  |                   | -3.5%                                       | -3.6%          | -3.6%             | -3.3%                       | -3.5%                                 | -3.4%                              | -3.5%          | -3.5%             | -3.3%                       | -3.8%                                 | -13.7%                             |     |
| MAM              | 322               | 303                                         | 303            | 317               | 320                         | 310                                   | 311                                | 303            | 318               | 320                         | 307                                   | 283                                |     |
|                  |                   | -5.8%                                       | -5.9%          | -1.3%             | -0.6%                       | -3.6%                                 | -3.4%                              | -5.8%          | -1.2%             | -0.5%                       | -4.5%                                 | -12.1%                             |     |
| JJA              | 309               | 292                                         | 292            | 288               | 296                         | 301                                   | 301                                | 292            | 289               | 293                         | 290                                   | 253                                |     |
|                  |                   | -5.4%                                       | -5.6%          | -6.7%             | -4.1%                       | -2.5%                                 | -2.6%                              | -5.4%          | -6.6%             | -5.1%                       | -6.1%                                 | -18.0%                             |     |
| SON              | 328               | 313                                         | 313            | 311               | 314                         | 315                                   | 316                                | 313            | 312               | 313                         | 311                                   | 266                                |     |
|                  |                   | -4.4%                                       | -4.6%          | -5.0%             | -4.1%                       | -3.8%                                 | -3.5%                              | -4.4%          | -4.8%             | -4.3%                       | -5.0%                                 | -18.7%                             |     |
| Average Annual   | 326               | 310                                         | 310            | 312               | 316                         | 315                                   | 315                                | 310            | 313               | 315                         | 310                                   | 275                                |     |
|                  |                   | -4.7%                                       | -4.9%          | -4.1%             | -3.0%                       | -3.4%                                 | -3.2%                              | -4.7%          | -4.0%             | -3.3%                       | -4.8%                                 | -15.6%                             |     |
| Climate Scenario |                   | RCP 4.5.2 (HIRHAM5)                         |                |                   |                             |                                       |                                    |                |                   |                             |                                       |                                    |     |
| DJF              | 344               | 336                                         | 336            | 336               | 337                         | 336                                   | 336                                | 336            | 337               | 337                         | 336                                   | 320                                |     |
|                  |                   | -2.3%                                       | -2.4%          | -2.3%             | -2.2%                       | -2.3%                                 | -2.3%                              | -2.3%          | -2.2%             | -2.1%                       | -2.4%                                 | -7.1%                              |     |
| MAM              | 322               | 311                                         | 311            | 322               | 324                         | 317                                   | 317                                | 311            | 322               | 324                         | 315                                   | 307                                |     |
|                  |                   | -3.3%                                       | -3.3%          | 0.0%              | +0.6%                       | -1.4%                                 | -1.3%                              | -3.3%          | +0.1%             | +0.7%                       | -2.1%                                 | -4.7%                              |     |
| JJA              | 309               | 291                                         | 291            | 285               | 295                         | 303                                   | 303                                | 291            | 286               | 293                         | 291                                   | 271                                |     |
|                  |                   | -5.6%                                       | -5.8%          | -7.6%             | -4.6%                       | -1.9%                                 | -2.0%                              | -5.6%          | -7.5%             | -5.2%                       | -5.8%                                 | -12.4%                             |     |
| SON              | 328               | 321                                         | 321            | 318               | 320                         | 322                                   | 323                                | 321            | 318               | 320                         | 320                                   | 292                                |     |
|                  |                   | -2.0%                                       | -2.1%          | -3.0%             | -2.3%                       | -1.6%                                 | -1.4%                              | -2.0%          | -2.9%             | -2.3%                       | -2.5%                                 | -10.8%                             |     |
| Average Annual   | 326               | 315                                         | 315            | 315               | 319                         | 320                                   | 320                                | 315            | 316               | 318                         | 315                                   | 297                                |     |
|                  |                   | -3.3%                                       | -3.4%          | -3.2%             | -2.1%                       | -1.8%                                 | -1.7%                              | -3.3%          | -3.1%             | -2.2%                       | -3.1%                                 | -8.7%                              |     |
| Climate Scenario |                   | RCP 4.5.3 (RCA4)                            |                |                   |                             |                                       |                                    |                |                   |                             |                                       |                                    |     |
| DJF              | 344               | 337                                         | 337            | 337               | 337                         | 337                                   | 337                                | 337            | 337               | 337                         | 337                                   | 322                                |     |
|                  |                   | -2.1%                                       | -2.2%          | -2.2%             | -2.1%                       | -2.1%                                 | -2.1%                              | -2.1%          | -2.1%             | -2.1%                       | -2.2%                                 | -6.6%                              |     |
| MAM              | 322               | 318                                         | 317            | 325               | 326                         | 322                                   | 322                                | 318            | 325               | 327                         | 320                                   | 313                                |     |
|                  |                   | -1.3%                                       | -1.3%          | +1.0%             | +1.4%                       | 0.0%                                  | +0.1%                              | -1.3%          | +1.1%             | +1.7%                       | -0.4%                                 | -2.7%                              |     |
| JJA              | 309               | 303                                         | 302            | 295               | 302                         | 311                                   | 311                                | 303            | 295               | 301                         | 302                                   | 283                                |     |
|                  |                   | -2.0%                                       | -2.1%          | -4.5%             | -2.1%                       | +0.7%                                 | +0.6%                              | -2.0%          | -4.4%             | -2.4%                       | -2.3%                                 | -8.4%                              |     |
| SON              | 328               | 322                                         | 321            | 318               | 320                         | 323                                   | 324                                | 322            | 318               | 320                         | 320                                   | 292                                |     |
|                  |                   | -1.8%                                       | -1.9%          | -3.0%             | -2.2%                       | -1.3%                                 | -1.1%                              | -1.8%          | -2.9%             | -2.2%                       | -2.3%                                 | -10.9%                             |     |
| Average Annual   | 326               | 320                                         | 319            | 319               | 321                         | 323                                   | 323                                | 320            | 319               | 321                         | 320                                   | 302                                |     |
|                  |                   | -1.8%                                       | -1.9%          | -2.2%             | -1.3%                       | -0.7%                                 | -0.7%                              | -1.8%          | -2.1%             | -1.3%                       | -1.8%                                 | -7.1%                              |     |

**Table S2.** Comparison of average soil water content by season between model SWAT 2010-2017 and V1, V2.1-V2.5 and V3.1-V3.5 for 2041–2050 in the Bystra catchment for climate projection RCP 8.5.1, RCP 8.5.2, RCP 8.5.3. Bold numbers indicate soil water content, and shaded numbers indicate percentage change (red indicates % decrease in content and blue indicates % increase in content). Dark red and dark blue shading indicates large changes, while light red and light blue shading indicates small changes (author’s own study).

| Time Interval    |                   | 2041-2050                                   |                           |                   |                             |                                       |                                    |                           |                   |                             |                                       |                                    |
|------------------|-------------------|---------------------------------------------|---------------------------|-------------------|-----------------------------|---------------------------------------|------------------------------------|---------------------------|-------------------|-----------------------------|---------------------------------------|------------------------------------|
| Type of Scenario | Model 2010 - 2017 | Variant 1 Only Climate Change (V1)          | Variant 2 - Low Retention |                   |                             |                                       |                                    | Variant 3 - Low Retention |                   |                             |                                       |                                    |
|                  |                   |                                             | More Ponds                |                   |                             |                                       |                                    | More Reservoirs           |                   |                             |                                       |                                    |
|                  |                   |                                             | Cereals (V2.1)            | Vegetables (V2.2) | Irrigated Vegetables (V2.3) | Irrigated Vegetables + Cereals (V2.4) | Irrigated Orchard + Cereals (V2.5) | Cereals (V3.1)            | Vegetables (V3.2) | Irrigated Vegetables (V3.3) | Irrigated Vegetables + Cereals (V3.4) | Irrigated Orchard + Cereals (V3.5) |
| Season           |                   | Seasonal Average of Soil Water Content [mm] |                           |                   |                             |                                       |                                    |                           |                   |                             |                                       |                                    |
| Climate Scenario |                   | RCP 8.5.1 (RACMO22E)                        |                           |                   |                             |                                       |                                    |                           |                   |                             |                                       |                                    |
| DJF              | 344               | 340                                         | 339                       | 337               | 337                         | 340                                   | 339                                | 340                       | 340               | 340                         | 340                                   | 320                                |
|                  |                   | -1.3%                                       | -1.4%                     | -2.0%             | -2.0%                       | -1.3%                                 | -1.4%                              | -1.3%                     | -1.3%             | -1.3%                       | -1.3%                                 | -7.1%                              |
| MAM              | 322               | 318                                         | 318                       | 323               | 323                         | 321                                   | 322                                | 318                       | 327               | 328                         | 320                                   | 308                                |
|                  |                   | -1.2%                                       | -1.3%                     | +0.3%             | +0.3%                       | -0.1%                                 | 0.0%                               | -1.2%                     | +1.6%             | +2.0%                       | -0.4%                                 | -4.1%                              |
| JJA              | 309               | 313                                         | 313                       | 302               | 302                         | 318                                   | 318                                | 313                       | 302               | 307                         | 310                                   | 289                                |
|                  |                   | +1.4%                                       | +1.3%                     | -2.4%             | -2.4%                       | +2.9%                                 | +2.9%                              | +1.4%                     | -2.3%             | -0.7%                       | +0.5%                                 | -6.3%                              |
| SON              | 328               | 327                                         | 326                       | 329               | 329                         | 327                                   | 328                                | 327                       | 324               | 325                         | 326                                   | 297                                |
|                  |                   | -0.2%                                       | -0.4%                     | +0.4%             | +0.4%                       | -0.1%                                 | +0.2%                              | -0.2%                     | -1.1%             | -0.8%                       | -0.6%                                 | -9.4%                              |
| Average Annual   | 326               | 324                                         | 324                       | 323               | 323                         | 327                                   | 327                                | 324                       | 323               | 325                         | 324                                   | 304                                |
|                  |                   | -0.4%                                       | -0.5%                     | -0.9%             | -0.9%                       | +0.3%                                 | +0.4%                              | -0.4%                     | -0.8%             | -0.2%                       | -0.5%                                 | -6.7%                              |
| Climate Scenario |                   | RCP 4.5.2 (HIRHAM5)                         |                           |                   |                             |                                       |                                    |                           |                   |                             |                                       |                                    |
| DJF              | 344               | 342                                         | 342                       | 342               | 342                         | 342                                   | 341                                | 342                       | 342               | 342                         | 342                                   | 336                                |
|                  |                   | -0.7%                                       | -0.8%                     | -0.7%             | -0.7%                       | -0.7%                                 | -0.8%                              | -0.7%                     | -0.6%             | -0.6%                       | -0.7%                                 | -2.3%                              |
| MAM              | 322               | 321                                         | 321                       | 329               | 330                         | 325                                   | 326                                | 321                       | 329               | 331                         | 324                                   | 323                                |
|                  |                   | -0.1%                                       | -0.1%                     | +2.4%             | +2.7%                       | +1.1%                                 | +1.2%                              | -0.1%                     | +2.4%             | +2.9%                       | +0.8%                                 | +0.6%                              |
| JJA              | 309               | 306                                         | 306                       | 300               | 306                         | 314                                   | 313                                | 306                       | 300               | 307                         | 306                                   | 295                                |
|                  |                   | -0.8%                                       | -1.0%                     | -3.0%             | -0.9%                       | +1.5%                                 | +1.5%                              | -0.8%                     | -2.9%             | -0.7%                       | -1.0%                                 | -4.4%                              |
| SON              | 328               | 329                                         | 329                       | 327               | 328                         | 329                                   | 330                                | 329                       | 327               | 329                         | 328                                   | 313                                |
|                  |                   | +0.4%                                       | +0.3%                     | -0.2%             | +0.2%                       | +0.5%                                 | +0.7%                              | +0.4%                     | -0.1%             | +0.4%                       | +0.1%                                 | -4.5%                              |
| Average Annual   | 326               | 325                                         | 324                       | 324               | 327                         | 327                                   | 328                                | 325                       | 325               | 327                         | 325                                   | 317                                |
|                  |                   | -0.3%                                       | -0.4%                     | -0.3%             | +0.3%                       | +0.6%                                 | +0.6%                              | -0.3%                     | -0.3%             | +0.5%                       | -0.2%                                 | -2.6%                              |
| Climate Scenario |                   | RCP 8.5.3 (RCA4)                            |                           |                   |                             |                                       |                                    |                           |                   |                             |                                       |                                    |
| DJF              | 344               | 340                                         | 340                       | 340               | 339                         | 340                                   | 340                                | 340                       | 340               | 340                         | 340                                   | 332                                |
|                  |                   | -1.2%                                       | -1.3%                     | -1.2%             | -1.4%                       | -1.3%                                 | -1.3%                              | -1.2%                     | -1.1%             | -1.1%                       | -1.2%                                 | -3.5%                              |
| MAM              | 322               | 321                                         | 321                       | 328               | 325                         | 325                                   | 326                                | 321                       | 328               | 330                         | 324                                   | 319                                |
|                  |                   | -0.2%                                       | -0.2%                     | +2.0%             | +1.1%                       | +1.1%                                 | +1.3%                              | -0.2%                     | +2.0%             | +2.6%                       | +0.7%                                 | -0.8%                              |
| JJA              | 309               | 306                                         | 305                       | 294               | 306                         | 314                                   | 314                                | 306                       | 294               | 301                         | 304                                   | 286                                |
|                  |                   | -1.0%                                       | -1.2%                     | -4.8%             | -1.0%                       | +1.6%                                 | +1.5%                              | -1.0%                     | -4.7%             | -2.5%                       | -1.5%                                 | -7.4%                              |
| SON              | 328               | 328                                         | 328                       | 325               | 328                         | 329                                   | 329                                | 328                       | 325               | 327                         | 327                                   | 306                                |
|                  |                   | +0.2%                                       | +0.1%                     | -0.8%             | +0.1%                       | +0.4%                                 | +0.5%                              | +0.2%                     | -0.7%             | -0.2%                       | -0.2%                                 | -6.5%                              |
| Average Annual   | 326               | 324                                         | 323                       | 322               | 325                         | 327                                   | 327                                | 324                       | 322               | 325                         | 324                                   | 311                                |
|                  |                   | -0.6%                                       | -0.7%                     | -1.2%             | -0.3%                       | +0.4%                                 | +0.5%                              | -0.6%                     | -1.1%             | -0.3%                       | -0.6%                                 | -4.5%                              |

**Table S3.** Comparison of seasonal total runoff between model SWAT 2010-2017 and V1, V2.1-V2.5 and V3.1-V3.5 for 2041–2050 in the Bystra catchment for climate projection RCP 4.5.1, RCP 4.5.2, RCP 4.5.3. Bold numbers indicate total runoff, and shaded numbers indicate percentage change (red indicates % decrease in content and blue indicates % increase in content). Dark red and dark blue shading indicates large changes, while light red and light blue shading indicates small changes (author’s own study).

| Time Interval    |                   | 2041-2050                           |                |                   |                             |                                       |                                  |                |                   |                             |                                       |                                  |
|------------------|-------------------|-------------------------------------|----------------|-------------------|-----------------------------|---------------------------------------|----------------------------------|----------------|-------------------|-----------------------------|---------------------------------------|----------------------------------|
| Type of Scenario | Model 2010 - 2017 | Variant 2 - Low Retention           |                |                   |                             |                                       | Variant 3 - Low Retention        |                |                   |                             |                                       |                                  |
|                  |                   | Variant 1 Only Climate Change (V1)  | More Ponds     |                   |                             |                                       | More Reservoirs                  |                |                   |                             |                                       |                                  |
|                  |                   |                                     | Cereals (V2.1) | Vegetables (V2.2) | Irrigated Vegetables (V2.3) | Irrigated Vegetables + Cereals (V2.4) | Irrigated Orkid + Cereals (V2.5) | Cereals (V3.1) | Vegetables (V3.2) | Irrigated Vegetables (V3.3) | Irrigated Vegetables + Cereals (V3.4) | Irrigated Orkid + Cereals (V3.5) |
| Season           |                   | Seasonal Total of Total Runoff [mm] |                |                   |                             |                                       |                                  |                |                   |                             |                                       |                                  |
| Climate Scenario |                   | RCP 4.5.1 (RACMO22E)                |                |                   |                             |                                       |                                  |                |                   |                             |                                       |                                  |
| DJF              | 55                | 35                                  | 35             | 34                | 40                          | 45                                    | 46                               | 35             | 34                | 38                          | 36                                    | 27                               |
|                  |                   | -36%                                | -37%           | -38%              | -26%                        | -18%                                  | -15%                             | -36%           | -37%              | -30%                        | -34%                                  | -51%                             |
| MAM              | 54                | 31                                  | 30             | 31                | 36                          | 40                                    | 42                               | 31             | 31                | 35                          | 32                                    | 24                               |
|                  |                   | -43%                                | -43%           | -43%              | -32%                        | -26%                                  | -22%                             | -43%           | -42%              | -35%                        | -40%                                  | -56%                             |
| JJA              | 46                | 30                                  | 30             | 31                | 38                          | 43                                    | 45                               | 30             | 31                | 36                          | 33                                    | 24                               |
|                  |                   | -35%                                | -36%           | -34%              | -17%                        | -7%                                   | -3%                              | -35%           | -33%              | -22%                        | -29%                                  | -49%                             |
| SON              | 48                | 32                                  | 32             | 31                | 39                          | 45                                    | 46                               | 32             | 31                | 36                          | 34                                    | 24                               |
|                  |                   | -33%                                | -34%           | -36%              | -20%                        | -6%                                   | -3%                              | -33%           | -36%              | -25%                        | -29%                                  | -49%                             |
| Annual Total     | 202               | 128                                 | 126            | 126               | 153                         | 173                                   | 179                              | 128            | 127               | 145                         | 135                                   | 98                               |
|                  |                   | -37%                                | -38%           | -38%              | -24%                        | -15%                                  | -11%                             | -37%           | -37%              | -28%                        | -33%                                  | -51%                             |
| Climate Scenario |                   | RCP 4.5.2 (HIRHAM5)                 |                |                   |                             |                                       |                                  |                |                   |                             |                                       |                                  |
| DJF              | 55                | 39                                  | 39             | 37                | 44                          | 49                                    | 50                               | 39             | 38                | 43                          | 41                                    | 34                               |
|                  |                   | -28%                                | -29%           | -32%              | -20%                        | -10%                                  | -9%                              | -28%           | -31%              | -22%                        | -25%                                  | -38%                             |
| MAM              | 54                | 43                                  | 43             | 43                | 48                          | 52                                    | 53                               | 43             | 43                | 48                          | 45                                    | 38                               |
|                  |                   | -19%                                | -20%           | -20%              | -10%                        | -4%                                   | -1%                              | -19%           | -19%              | -11%                        | -16%                                  | -28%                             |
| JJA              | 46                | 36                                  | 35             | 36                | 43                          | 49                                    | 50                               | 36             | 36                | 42                          | 39                                    | 32                               |
|                  |                   | -22%                                | -23%           | -23%              | -6%                         | +6%                                   | +8%                              | -22%           | -22%              | -9%                         | -16%                                  | -31%                             |
| SON              | 48                | 36                                  | 36             | 33                | 41                          | 48                                    | 49                               | 36             | 33                | 40                          | 38                                    | 31                               |
|                  |                   | -25%                                | -26%           | -31%              | -15%                        | +1%                                   | +2%                              | -25%           | -31%              | -18%                        | -21%                                  | -35%                             |
| Annual Total     | 202               | 154                                 | 153            | 149               | 176                         | 198                                   | 201                              | 154            | 151               | 172                         | 163                                   | 136                              |
|                  |                   | -24%                                | -24%           | -26%              | -13%                        | -2%                                   | 0%                               | -24%           | -26%              | -15%                        | -19%                                  | -33%                             |
| Climate Scenario |                   | RCP 4.5.3 (RCA4)                    |                |                   |                             |                                       |                                  |                |                   |                             |                                       |                                  |
| DJF              | 55                | 50                                  | 50             | 48                | 54                          | 59                                    | 61                               | 50             | 48                | 53                          | 52                                    | 45                               |
|                  |                   | -7%                                 | -8%            | -13%              | -2%                         | +8%                                   | +11%                             | -8%            | -12%              | -2%                         | -5%                                   | -18%                             |
| MAM              | 54                | 51                                  | 50             | 50                | 55                          | 58                                    | 60                               | 51             | 50                | 55                          | 52                                    | 46                               |
|                  |                   | -6%                                 | -7%            | -7%               | +2%                         | +8%                                   | +12%                             | -6%            | -7%               | +2%                         | -3%                                   | -14%                             |
| JJA              | 46                | 39                                  | 39             | 38                | 45                          | 50                                    | 52                               | 39             | 39                | 45                          | 42                                    | 36                               |
|                  |                   | -15%                                | -15%           | -17%              | -3%                         | +9%                                   | +12%                             | -15%           | -17%              | -2%                         | -9%                                   | -22%                             |
| SON              | 48                | 44                                  | 44             | 41                | 48                          | 56                                    | 57                               | 44             | 41                | 48                          | 46                                    | 40                               |
|                  |                   | -8%                                 | -9%            | -15%              | 0%                          | +16%                                  | +19%                             | -8%            | -15%              | -1%                         | -3%                                   | -18%                             |
| Annual Total     | 202               | 185                                 | 183            | 176               | 201                         | 223                                   | 230                              | 185            | 178               | 201                         | 192                                   | 167                              |
|                  |                   | -9%                                 | -10%           | -13%              | -1%                         | +10%                                  | +13%                             | -9%            | -12%              | -1%                         | -5%                                   | -18%                             |

**Table S4.** Comparison of seasonal total runoff between model SWAT 2010-2017 and V1, V2.1-V2.5 and V3.1-V3.5 for 2041–2050 in the Bystra catchment for climate projection RCP 8.5.1, RCP 8.5.2, RCP 8.5.3. Bold numbers indicate total runoff, and shaded numbers indicate percentage change (red indicates % decrease in content and blue indicates % increase in content). Dark red and dark blue shading indicates large changes, while light red and light blue shading indicates small changes (author’s own study).

| Time Interval    |                                     | 2041-2050                          |                           |                   |                             |                                       |                                    |                           |                   |                             |                                       |                                    |
|------------------|-------------------------------------|------------------------------------|---------------------------|-------------------|-----------------------------|---------------------------------------|------------------------------------|---------------------------|-------------------|-----------------------------|---------------------------------------|------------------------------------|
| Type of Scenario | Model 2010 - 2017                   | Variant 1 Only Climate Change (V1) | Variant 2 - Low Retention |                   |                             |                                       |                                    | Variant 3 - Low Retention |                   |                             |                                       |                                    |
|                  |                                     |                                    | More Ponds                |                   |                             |                                       |                                    | More Reservoirs           |                   |                             |                                       |                                    |
|                  |                                     |                                    | Cereals (V2.1)            | Vegetables (V2.2) | Irrigated Vegetables (V2.3) | Irrigated Vegetables + Cereals (V2.4) | Irrigated Orchard + Cereals (V2.5) | Cereals (V3.1)            | Vegetables (V3.2) | Irrigated Vegetables (V3.3) | Irrigated Vegetables + Cereals (V3.4) | Irrigated Orchard + Cereals (V3.5) |
| Season           | Seasonal Total of Total Runoff [mm] |                                    |                           |                   |                             |                                       |                                    |                           |                   |                             |                                       |                                    |
| Climate Scenario | RCP 8.5.1 (RACMO22E)                |                                    |                           |                   |                             |                                       |                                    |                           |                   |                             |                                       |                                    |
| DJF              | 55                                  | 55<br>0%                           | 54<br>-1%                 | 48<br>-12%        | 58<br>+6%                   | 64<br>+17%                            | 65<br>+20%                         | 55<br>0%                  | 52<br>-4%         | 58<br>+6%                   | 56<br>+3%                             | 47<br>-14%                         |
| MAM              | 54                                  | 47<br>-12%                         | 46<br>-13%                | 47<br>-13%        | 52<br>-3%                   | 56<br>+4%                             | 58<br>+8%                          | 47<br>-12%                | 47<br>-12%        | 52<br>-3%                   | 49<br>-8%                             | 41<br>-23%                         |
| JJA              | 46                                  | 49<br>+7%                          | 49<br>+6%                 | 47<br>+2%         | 56<br>+22%                  | 62<br>+34%                            | 64<br>+38%                         | 49<br>+7%                 | 49<br>+6%         | 56<br>+21%                  | 52<br>+13%                            | 43<br>-6%                          |
| SON              | 48                                  | 49<br>+1%                          | 48<br>0%                  | 49<br>+3%         | 53<br>+11%                  | 61<br>+26%                            | 63<br>+30%                         | 49<br>+1%                 | 46<br>-5%         | 53<br>+10%                  | 51<br>+6%                             | 43<br>-11%                         |
| Annual Total     | 202                                 | 199<br>-1%                         | 198<br>-2%                | 192<br>-5%        | 220<br>+9%                  | 242<br>+20%                           | 250<br>+23%                        | 199<br>-2%                | 195<br>-4%        | 218<br>+8%                  | 209<br>+3%                            | 174<br>-14%                        |
| Climate Scenario | RCP 8.5.2 (HIRHAM5)                 |                                    |                           |                   |                             |                                       |                                    |                           |                   |                             |                                       |                                    |
| DJF              | 55                                  | 52<br>-5%                          | 52<br>-5%                 | 50<br>-9%         | 55<br>+1%                   | 60<br>+10%                            | 61<br>+11%                         | 52<br>-5%                 | 50<br>-8%         | 56<br>+3%                   | 54<br>-2%                             | 47<br>-13%                         |
| MAM              | 54                                  | 61<br>+13%                         | 60<br>+12%                | 60<br>+12%        | 65<br>+20%                  | 67<br>+25%                            | 68<br>+27%                         | 61<br>+13%                | 61<br>+13%        | 66<br>+22%                  | 62<br>+16%                            | 57<br>+6%                          |
| JJA              | 46                                  | 53<br>+15%                         | 52<br>+14%                | 52<br>+14%        | 59<br>+27%                  | 63<br>+36%                            | 64<br>+38%                         | 53<br>+15%                | 53<br>+14%        | 60<br>+29%                  | 56<br>+21%                            | 50<br>+9%                          |
| SON              | 48                                  | 51<br>+6%                          | 51<br>+5%                 | 48<br>0%          | 55<br>+14%                  | 61<br>+27%                            | 62<br>+28%                         | 51<br>+6%                 | 48<br>+1%         | 56<br>+16%                  | 53<br>+11%                            | 47<br>-1%                          |
| Annual Total     | 202                                 | 217<br>+7%                         | 215<br>+6%                | 211<br>+4%        | 233<br>+15%                 | 251<br>+24%                           | 254<br>+26%                        | 217<br>+7%                | 212<br>+5%        | 237<br>+17%                 | 225<br>+11%                           | 202<br>0%                          |
| Climate Scenario | RCP 8.5.3 (RCA4)                    |                                    |                           |                   |                             |                                       |                                    |                           |                   |                             |                                       |                                    |
| DJF              | 55                                  | 71<br>+30%                         | 70<br>+29%                | 66<br>+21%        | 71<br>+31%                  | 79<br>+45%                            | 80<br>+46%                         | 71<br>+30%                | 66<br>+22%        | 72<br>+33%                  | 72<br>+32%                            | 64<br>+17%                         |
| MAM              | 54                                  | 68<br>+27%                         | 68<br>+26%                | 66<br>+23%        | 69<br>+28%                  | 75<br>+40%                            | 77<br>+43%                         | 68<br>+27%                | 66<br>+23%        | 71<br>+33%                  | 69<br>+30%                            | 63<br>+18%                         |
| JJA              | 46                                  | 60<br>+29%                         | 59<br>+28%                | 56<br>+22%        | 67<br>+46%                  | 70<br>+51%                            | 70<br>+53%                         | 60<br>+29%                | 57<br>+23%        | 64<br>+38%                  | 62<br>+34%                            | 57<br>+23%                         |
| SON              | 48                                  | 70<br>+45%                         | 69<br>+44%                | 64<br>+32%        | 68<br>+42%                  | 80<br>+67%                            | 81<br>+68%                         | 70<br>+45%                | 64<br>+34%        | 72<br>+50%                  | 72<br>+49%                            | 64<br>+33%                         |
| Annual Total     | 202                                 | 268<br>+33%                        | 266<br>+31%               | 251<br>+24%       | 276<br>+36%                 | 304<br>+50%                           | 308<br>+52%                        | 268<br>+33%               | 253<br>+25%       | 279<br>+38%                 | 275<br>+36%                           | 247<br>+22%                        |

**Table S5.** Comparison of seasonal sediment yield between model SWAT 2010-2017 and V1, V2.1-V2.5 and V3.1-V3.5 for 2041–2050 in the Bystra catchment for climate projection RCP 4.5.1, RCP 4.5.2, RCP 4.5.3. Bold numbers indicate sediment yield, and shaded numbers indicate percentage change (red indicates % decrease in content and blue indicates % increase in content). Dark red and dark blue shading indicates large changes, while light red and light blue shading indicates small changes (author’s own study).

| Time Interval    |                       | 2041-2050                          |                |                   |                             |                                       |                                  |                |                   |                             |                                       |                                  |
|------------------|-----------------------|------------------------------------|----------------|-------------------|-----------------------------|---------------------------------------|----------------------------------|----------------|-------------------|-----------------------------|---------------------------------------|----------------------------------|
| Type of Scenario | Model 2010 - 2017     | Variant 2 - Low Retention          |                |                   |                             |                                       | Variant 3 - Low Retention        |                |                   |                             |                                       |                                  |
|                  |                       | Variant 1 Only Climate Change (V1) | More Ponds     |                   |                             |                                       | More Reservoirs                  |                |                   |                             |                                       |                                  |
|                  |                       |                                    | Cereals (V2.1) | Vegetables (V2.2) | Irrigated Vegetables (V2.3) | Irrigated Vegetables + Cereals (V2.4) | Irrigated Orkid + Cereals (V2.5) | Cereals (V3.1) | Vegetables (V3.2) | Irrigated Vegetables (V3.3) | Irrigated Vegetables + Cereals (V3.4) | Irrigated Orkid + Cereals (V3.5) |
| Season           | Sediment Yield [t/ha] |                                    |                |                   |                             |                                       |                                  |                |                   |                             |                                       |                                  |
| Climate Scenario | RCP 4.5.1 (RACMO22E)  |                                    |                |                   |                             |                                       |                                  |                |                   |                             |                                       |                                  |
| DJF              | 0.21                  | 0.17                               | 0.14           | 0.20              | 0.20                        | 0.16                                  | 0.04                             | 0.17           | 0.24              | 0.25                        | 0.20                                  | 0.05                             |
|                  |                       | -17%                               | -32%           | -4%               | -3%                         | -21%                                  | -82%                             | -17%           | +18%              | +18%                        | -5%                                   | -77%                             |
| MAM              | 0.18                  | 0.08                               | 0.06           | 0.13              | 0.15                        | 0.13                                  | 0.02                             | 0.08           | 0.17              | 0.17                        | 0.14                                  | 0.03                             |
|                  |                       | -58%                               | -67%           | -27%              | -21%                        | -29%                                  | -89%                             | -58%           | -10%              | -6%                         | -26%                                  | -86%                             |
| JJA              | 0.11                  | 0.15                               | 0.12           | 0.24              | 0.30                        | 0.26                                  | 0.04                             | 0.15           | 0.30              | 0.33                        | 0.24                                  | 0.05                             |
|                  |                       | +44%                               | +16%           | +131%             | +182%                       | +151%                                 | -59%                             | +44%           | +181%             | +214%                       | +130%                                 | -50%                             |
| SON              | 0.15                  | 0.15                               | 0.13           | 0.09              | 0.12                        | 0.12                                  | 0.03                             | 0.15           | 0.12              | 0.13                        | 0.11                                  | 0.04                             |
|                  |                       | 0%                                 | -17%           | -38%              | -18%                        | -22%                                  | -81%                             | 0%             | -24%              | -17%                        | -30%                                  | -77%                             |
| Annual Total     | 0.65                  | 0.55                               | 0.45           | 0.67              | 0.77                        | 0.68                                  | 0.13                             | 0.55           | 0.82              | 0.87                        | 0.68                                  | 0.16                             |
|                  |                       | -15%                               | -31%           | +4%               | +19%                        | +4%                                   | -80%                             | -15%           | +27%              | +35%                        | +5%                                   | -75%                             |
| Climate Scenario | RCP 4.5.2 (HIRHAM5)   |                                    |                |                   |                             |                                       |                                  |                |                   |                             |                                       |                                  |
| DJF              | 0.21                  | 0.11                               | 0.09           | 0.12              | 0.13                        | 0.11                                  | 0.02                             | 0.11           | 0.15              | 0.15                        | 0.13                                  | 0.03                             |
|                  |                       | -49%                               | -58%           | -41%              | -39%                        | -47%                                  | -88%                             | -49%           | -29%              | -28%                        | -37%                                  | -87%                             |
| MAM              | 0.18                  | 0.13                               | 0.11           | 0.25              | 0.26                        | 0.21                                  | 0.04                             | 0.13           | 0.30              | 0.31                        | 0.24                                  | 0.05                             |
|                  |                       | -31%                               | -43%           | +34%              | +39%                        | +13%                                  | -80%                             | -31%           | +62%              | +68%                        | +31%                                  | -74%                             |
| JJA              | 0.11                  | 0.12                               | 0.10           | 0.15              | 0.23                        | 0.23                                  | 0.03                             | 0.12           | 0.19              | 0.22                        | 0.17                                  | 0.04                             |
|                  |                       | +17%                               | -5%            | +47%              | +122%                       | +117%                                 | -70%                             | +17%           | +77%              | +110%                       | +64%                                  | -65%                             |
| SON              | 0.15                  | 0.19                               | 0.16           | 0.10              | 0.15                        | 0.16                                  | 0.04                             | 0.19           | 0.13              | 0.15                        | 0.13                                  | 0.05                             |
|                  |                       | +24%                               | +2%            | -31%              | +1%                         | +3%                                   | -72%                             | +24%           | -15%              | -1%                         | -14%                                  | -66%                             |
| Annual Total     | 0.65                  | 0.54                               | 0.45           | 0.63              | 0.77                        | 0.70                                  | 0.13                             | 0.54           | 0.76              | 0.83                        | 0.67                                  | 0.16                             |
|                  |                       | -16%                               | -31%           | -3%               | +19%                        | +9%                                   | -79%                             | -16%           | +17%              | +28%                        | +4%                                   | -75%                             |
| Climate Scenario | RCP 4.5.3 (RCA4)      |                                    |                |                   |                             |                                       |                                  |                |                   |                             |                                       |                                  |
| DJF              | 0.21                  | 0.11                               | 0.09           | 0.15              | 0.15                        | 0.13                                  | 0.02                             | 0.11           | 0.17              | 0.18                        | 0.15                                  | 0.03                             |
|                  |                       | -47%                               | -56%           | -30%              | -29%                        | -39%                                  | -89%                             | -47%           | -16%              | -16%                        | -28%                                  | -85%                             |
| MAM              | 0.18                  | 0.15                               | 0.12           | 0.26              | 0.27                        | 0.22                                  | 0.04                             | 0.15           | 0.32              | 0.33                        | 0.25                                  | 0.05                             |
|                  |                       | -18%                               | -33%           | +42%              | +47%                        | +19%                                  | -78%                             | -18%           | +73%              | +78%                        | +38%                                  | -72%                             |
| JJA              | 0.11                  | 0.11                               | 0.09           | 0.08              | 0.13                        | 0.13                                  | 0.02                             | 0.11           | 0.10              | 0.13                        | 0.10                                  | 0.02                             |
|                  |                       | +5%                                | -16%           | -20%              | +22%                        | +23%                                  | -81%                             | +5%            | -6%               | +23%                        | -8%                                   | -77%                             |
| SON              | 0.15                  | 0.20                               | 0.17           | 0.13              | 0.18                        | 0.18                                  | 0.04                             | 0.20           | 0.15              | 0.18                        | 0.16                                  | 0.04                             |
|                  |                       | +33%                               | +9%            | -17%              | +18%                        | +18%                                  | -77%                             | +33%           | 0%                | +20%                        | +4%                                   | -71%                             |
| Annual Total     | 0.65                  | 0.57                               | 0.47           | 0.62              | 0.72                        | 0.65                                  | 0.12                             | 0.57           | 0.74              | 0.81                        | 0.66                                  | 0.15                             |
|                  |                       | -12%                               | -28%           | -5%               | +12%                        | +1%                                   | -82%                             | -12%           | +15%              | +26%                        | +1%                                   | -77%                             |

**Table S6.** Comparison of seasonal sediment yield between model SWAT 2010-2017 and V1, V2.1-V2.5 and V3.1-V3.5 for 2041–2050 in the Bystra catchment for climate projection RCP 8.5.1, RCP 8.5.2, RCP 8.5.3. Bold numbers indicate sediment yield, and shaded numbers indicate percentage change (red indicates % decrease in content and blue indicates % increase in content). Dark red and dark blue shading indicates large changes, while light red and light blue shading indicates small changes (author’s own study).

| Time Interval    |                       | 2041-2050                          |                |                   |                             |                                       |                                    |                |                   |                             |                                       |                                    |
|------------------|-----------------------|------------------------------------|----------------|-------------------|-----------------------------|---------------------------------------|------------------------------------|----------------|-------------------|-----------------------------|---------------------------------------|------------------------------------|
| Type of Scenario | Model 2010 - 2017     | Variant 2 - Low Retention          |                |                   |                             |                                       | Variant 3 - Low Retention          |                |                   |                             |                                       |                                    |
|                  |                       | Variant 1 Only Climate Change (V1) | More Ponds     |                   |                             |                                       | More Reservoirs                    |                |                   |                             |                                       |                                    |
|                  |                       |                                    | Cereals (V2.1) | Vegetables (V2.2) | Irrigated Vegetables (V2.3) | Irrigated Vegetables + Cereals (V2.4) | Irrigated Orchard + Cereals (V2.5) | Cereals (V3.1) | Vegetables (V3.2) | Irrigated Vegetables (V3.3) | Irrigated Vegetables + Cereals (V3.4) | Irrigated Orchard + Cereals (V3.5) |
|                  |                       |                                    |                |                   |                             |                                       |                                    |                |                   |                             |                                       |                                    |
| Season           | Sediment Yield [t/ha] |                                    |                |                   |                             |                                       |                                    |                |                   |                             |                                       |                                    |
| Climate Scenario | RCP 8.5.1 (RACMO22E)  |                                    |                |                   |                             |                                       |                                    |                |                   |                             |                                       |                                    |
| DJF              | 0.21                  | 0.25<br>+21%                       | 0.21<br>0%     | 0.15<br>-26%      | 0.34<br>+65%                | 0.26<br>+24%                          | 0.07<br>-68%                       | 0.25<br>+21%   | 0.41<br>+99%      | 0.41<br>+100%               | 0.30<br>+47%                          | 0.08<br>-61%                       |
| MAM              | 0.18                  | 0.07<br>-63%                       | 0.06<br>-70%   | 0.19<br>+3%       | 0.18<br>-3%                 | 0.16<br>-11%                          | 0.02<br>-89%                       | 0.07<br>-63%   | 0.19<br>+4%       | 0.22<br>+18%                | 0.17<br>-7%                           | 0.03<br>-85%                       |
| JJA              | 0.11                  | 0.22<br>+107%                      | 0.18<br>+69%   | 0.21<br>+103%     | 0.29<br>+171%               | 0.26<br>+146%                         | 0.05<br>-50%                       | 0.22<br>+107%  | 0.26<br>+151%     | 0.30<br>+184%               | 0.23<br>+120%                         | 0.07<br>-38%                       |
| SON              | 0.15                  | 0.18<br>+18%                       | 0.15<br>-3%    | 0.31<br>+102%     | 0.18<br>+20%                | 0.15<br>-1%                           | 0.04<br>-74%                       | 0.18<br>+18%   | 0.22<br>+42%      | 0.22<br>+45%                | 0.17<br>+12%                          | 0.05<br>-68%                       |
| Annual Total     | 0.65                  | 0.72<br>+11%                       | 0.59<br>-10%   | 0.86<br>+33%      | 0.99<br>+53%                | 0.83<br>+28%                          | 0.18<br>-73%                       | 0.72<br>+11%   | 1.08<br>+67%      | 1.15<br>+77%                | 0.88<br>+35%                          | 0.22<br>-66%                       |
| Climate Scenario | RCP 8.5.2 (HIRHAM5)   |                                    |                |                   |                             |                                       |                                    |                |                   |                             |                                       |                                    |
| DJF              | 0.21                  | 0.12<br>-42%                       | 0.10<br>-52%   | 0.15<br>-29%      | 0.15<br>-29%                | 0.12<br>-42%                          | 0.03<br>-87%                       | 0.12<br>-42%   | 0.19<br>-11%      | 0.19<br>-11%                | 0.15<br>-26%                          | 0.03<br>-85%                       |
| MAM              | 0.18                  | 0.24<br>+32%                       | 0.20<br>+9%    | 0.37<br>+101%     | 0.38<br>+106%               | 0.31<br>+69%                          | 0.06<br>-67%                       | 0.24<br>+32%   | 0.45<br>+146%     | 0.46<br>+150%               | 0.37<br>+99%                          | 0.07<br>-60%                       |
| JJA              | 0.11                  | 0.21<br>+103%                      | 0.17<br>+65%   | 0.24<br>+132%     | 0.32<br>+200%               | 0.29<br>+175%                         | 0.05<br>-50%                       | 0.21<br>+103%  | 0.30<br>+183%     | 0.34<br>+227%               | 0.27<br>+154%                         | 0.06<br>-40%                       |
| SON              | 0.15                  | 0.22<br>+43%                       | 0.18<br>+18%   | 0.15<br>-1%       | 0.17<br>+14%                | 0.16<br>+3%                           | 0.05<br>-69%                       | 0.22<br>+43%   | 0.18<br>+19%      | 0.20<br>+32%                | 0.16<br>+6%                           | 0.06<br>-63%                       |
| Annual Total     | 0.65                  | 0.79<br>+22%                       | 0.65<br>+1%    | 0.91<br>+41%      | 1.02<br>+57%                | 0.88<br>+35%                          | 0.19<br>-71%                       | 0.79<br>+22%   | 1.11<br>+72%      | 1.19<br>+83%                | 0.95<br>+46%                          | 0.22<br>-65%                       |
| Climate Scenario | RCP 8.5.3 (RCA4)      |                                    |                |                   |                             |                                       |                                    |                |                   |                             |                                       |                                    |
| DJF              | 0.21                  | 0.14<br>-34%                       | 0.11<br>-47%   | 0.18<br>-13%      | 0.16<br>-24%                | 0.15<br>-30%                          | 0.03<br>-85%                       | 0.14<br>-34%   | 0.23<br>+8%       | 0.23<br>+9%                 | 0.17<br>-16%                          | 0.04<br>-81%                       |
| MAM              | 0.18                  | 0.16<br>-13%                       | 0.13<br>-29%   | 0.31<br>+68%      | 0.31<br>+67%                | 0.25<br>+38%                          | 0.05<br>-75%                       | 0.16<br>-13%   | 0.38<br>+105%     | 0.39<br>+112%               | 0.30<br>+61%                          | 0.06<br>-70%                       |
| JJA              | 0.11                  | 0.14<br>+32%                       | 0.11<br>+7%    | 0.21<br>+101%     | 0.43<br>+307%               | 0.23<br>+119%                         | 0.04<br>-63%                       | 0.14<br>+32%   | 0.26<br>+146%     | 0.30<br>+182%               | 0.22<br>+105%                         | 0.05<br>-51%                       |
| SON              | 0.15                  | 0.57<br>+274%                      | 0.46<br>+204%  | 0.42<br>+178%     | 0.34<br>+127%               | 0.39<br>+159%                         | 0.12<br>-19%                       | 0.57<br>+274%  | 0.52<br>+240%     | 0.54<br>+259%               | 0.41<br>+174%                         | 0.15<br>0%                         |
| Annual Total     | 0.65                  | 1.00<br>+55%                       | 0.81<br>+26%   | 1.12<br>+73%      | 1.24<br>+91%                | 1.02<br>+58%                          | 0.24<br>-63%                       | 1.00<br>+54%   | 1.38<br>+112%     | 1.46<br>+125%               | 1.10<br>+70%                          | 0.30<br>-54%                       |

**Table S7.** Comparison of seasonal actual evapotranspiration between model SWAT 2010-2017 and V1, V2.1-V2.5 and V3.1-V3.5 for 2041–2050 in the Bystra catchment for climate projection RCP 4.5.1, RCP 4.5.2, RCP 4.5.3. Bold numbers indicate actual evapotranspiration, and shaded numbers indicate percentage change (red indicates % decrease in content and blue indicates % increase in content). Dark red and dark blue shading indicates large changes, while light red and light blue shading indicates small changes (author’s own study).

| Time Interval    |                                                  | 2041-2050                          |                |                   |                             |                                       |                                    |                |                   |                             |                                       |                                    |
|------------------|--------------------------------------------------|------------------------------------|----------------|-------------------|-----------------------------|---------------------------------------|------------------------------------|----------------|-------------------|-----------------------------|---------------------------------------|------------------------------------|
| Type of Scenario | Model 2010 - 2017                                | Variant 2 - Low Retention          |                |                   |                             |                                       | Variant 3 - Low Retention          |                |                   |                             |                                       |                                    |
|                  |                                                  | Variant 1 Only Climate Change (V1) | More Ponds     |                   |                             |                                       | More Reservoirs                    |                |                   |                             |                                       |                                    |
|                  |                                                  |                                    | Cereals (V2.1) | Vegetables (V2.2) | Irrigated Vegetables (V2.3) | Irrigated Vegetables + Cereals (V2.4) | Irrigated Orchard + Cereals (V2.5) | Cereals (V3.1) | Vegetables (V3.2) | Irrigated Vegetables (V3.3) | Irrigated Vegetables + Cereals (V3.4) | Irrigated Orchard + Cereals (V3.5) |
| Season           | Seasonal Total of Actual Evapotranspiration [mm] |                                    |                |                   |                             |                                       |                                    |                |                   |                             |                                       |                                    |
| Climate Scenario | RCP 4.5.1 (RACMO22E)                             |                                    |                |                   |                             |                                       |                                    |                |                   |                             |                                       |                                    |
| DJF              | 17                                               | 20                                 | 27             | 25                | 25                          | 27                                    | 25                                 | 27             | 25                | 25                          | 27                                    | 25                                 |
|                  |                                                  | +14%                               | +56%           | +48%              | +48%                        | +55%                                  | +46%                               | +57%           | +48%              | +48%                        | +55%                                  | +45%                               |
| MAM              | 138                                              | 154                                | 153            | 120               | 129                         | 162                                   | 162                                | 154            | 120               | 132                         | 153                                   | 154                                |
|                  |                                                  | +11%                               | +11%           | -13%              | -6%                         | +17%                                  | +17%                               | +11%           | -13%              | -5%                         | +10%                                  | +11%                               |
| JJA              | 167                                              | 166                                | 166            | 206               | 223                         | 216                                   | 237                                | 166            | 205               | 217                         | 194                                   | 220                                |
|                  |                                                  | -1%                                | 0%             | +23%              | +34%                        | +30%                                  | +42%                               | -1%            | +23%              | +30%                        | +16%                                  | +32%                               |
| SON              | 50                                               | 70                                 | 70             | 66                | 69                          | 73                                    | 88                                 | 70             | 66                | 68                          | 69                                    | 82                                 |
|                  |                                                  | +41%                               | +41%           | +33%              | +40%                        | +48%                                  | +77%                               | +41%           | +33%              | +38%                        | +40%                                  | +66%                               |
| Annual Total     | 372                                              | 409                                | 417            | 418               | 447                         | 478                                   | 512                                | 416            | 417               | 442                         | 443                                   | 481                                |
|                  |                                                  | +10%                               | +12%           | +12%              | +20%                        | +29%                                  | +38%                               | +12%           | +12%              | +19%                        | +19%                                  | +29%                               |
| Climate Scenario | RCP 4.5.2 (HIRHAM5)                              |                                    |                |                   |                             |                                       |                                    |                |                   |                             |                                       |                                    |
| DJF              | 17                                               | 24                                 | 24             | 23                | 24                          | 24                                    | 23                                 | 24             | 24                | 24                          | 24                                    | 23                                 |
|                  |                                                  | +42%                               | +41%           | +37%              | +37%                        | +41%                                  | +34%                               | +42%           | +37%              | +37%                        | +41%                                  | +34%                               |
| MAM              | 138                                              | 149                                | 148            | 119               | 126                         | 153                                   | 153                                | 149            | 119               | 128                         | 146                                   | 148                                |
|                  |                                                  | +7%                                | +7%            | -14%              | -9%                         | +11%                                  | +11%                               | +7%            | -14%              | -7%                         | +6%                                   | +7%                                |
| JJA              | 167                                              | 152                                | 153            | 191               | 205                         | 197                                   | 214                                | 152            | 191               | 204                         | 180                                   | 203                                |
|                  |                                                  | -9%                                | -9%            | +14%              | +23%                        | +18%                                  | +28%                               | -9%            | +14%              | +22%                        | +8%                                   | +22%                               |
| SON              | 50                                               | 61                                 | 61             | 58                | 61                          | 64                                    | 75                                 | 61             | 58                | 61                          | 61                                    | 73                                 |
|                  |                                                  | +23%                               | +24%           | +18%              | +22%                        | +29%                                  | +52%                               | +23%           | +17%              | +22%                        | +24%                                  | +47%                               |
| Annual Total     | 372                                              | 386                                | 386            | 391               | 415                         | 438                                   | 466                                | 386            | 391               | 416                         | 412                                   | 447                                |
|                  |                                                  | +4%                                | +4%            | +5%               | +12%                        | +18%                                  | +25%                               | +4%            | +5%               | +12%                        | +11%                                  | +20%                               |
| Climate Scenario | RCP 4.5.3 (RCA4)                                 |                                    |                |                   |                             |                                       |                                    |                |                   |                             |                                       |                                    |
| DJF              | 17                                               | 31                                 | 31             | 30                | 30                          | 31                                    | 29                                 | 31             | 30                | 30                          | 31                                    | 29                                 |
|                  |                                                  | +81%                               | +80%           | +75%              | +75%                        | +79%                                  | +67%                               | +81%           | +75%              | +75%                        | +79%                                  | +67%                               |
| MAM              | 138                                              | 136                                | 136            | 113               | 118                         | 139                                   | 138                                | 136            | 113               | 121                         | 135                                   | 135                                |
|                  |                                                  | -1%                                | -2%            | -18%              | +15%                        | +1%                                   | 0%                                 | -1%            | -18%              | +12%                        | -2%                                   | -2%                                |
| JJA              | 167                                              | 168                                | 169            | 203               | 220                         | 217                                   | 235                                | 168            | 203               | 220                         | 198                                   | 223                                |
|                  |                                                  | +1%                                | +1%            | +22%              | +32%                        | +30%                                  | +41%                               | +1%            | +22%              | +32%                        | +18%                                  | +34%                               |
| SON              | 50                                               | 69                                 | 69             | 66                | 69                          | 74                                    | 89                                 | 69             | 66                | 69                          | 70                                    | 86                                 |
|                  |                                                  | +40%                               | +40%           | +33%              | +40%                        | +50%                                  | +79%                               | +40%           | +32%              | +39%                        | +41%                                  | +73%                               |
| Annual Total     | 372                                              | 404                                | 405            | 412               | 438                         | 461                                   | 490                                | 404            | 412               | 440                         | 434                                   | 472                                |
|                  |                                                  | +9%                                | +9%            | +11%              | +18%                        | +24%                                  | +32%                               | +9%            | +11%              | +18%                        | +17%                                  | +27%                               |



**Table S8.** Comparison of seasonal actual evapotranspiration between model SWAT 2010-2017 and V1, V2.1-V2.5 and V3.1-V3.5 for 2041–2050 in the Bystra catchment for climate projection RCP 8.5.1, RCP 8.5.2, RCP 8.5.3. Bold numbers indicate actual evapotranspiration, and shaded numbers indicate percentage change (red indicates % decrease in content and blue indicates % increase in content). Dark red and dark blue shading indicates large changes, while light red and light blue shading indicates small changes (author’s own study).

| Time Interval    |                                                  | 2041-2050                               |                |                   |                             |                                       |                                              |                |                   |                             |                                       |                                    |
|------------------|--------------------------------------------------|-----------------------------------------|----------------|-------------------|-----------------------------|---------------------------------------|----------------------------------------------|----------------|-------------------|-----------------------------|---------------------------------------|------------------------------------|
| Type of Scenario | Model 2010 - 2017                                | Variant 2 - Low Retention<br>More Ponds |                |                   |                             |                                       | Variant 3 - Low Retention<br>More Reservoirs |                |                   |                             |                                       |                                    |
|                  |                                                  | Variant 1 Only Climate Change (V1)      | Cereals (V2.1) | Vegetables (V2.2) | Irrigated Vegetables (V2.3) | Irrigated Vegetables + Cereals (V2.4) | Irrigated Orchard + Cereals (V2.5)           | Cereals (V3.1) | Vegetables (V3.2) | Irrigated Vegetables (V3.3) | Irrigated Vegetables + Cereals (V3.4) | Irrigated Orchard + Cereals (V3.5) |
| Season           | Seasonal Total of Actual Evapotranspiration [mm] |                                         |                |                   |                             |                                       |                                              |                |                   |                             |                                       |                                    |
| Climate Scenario | RCP 8.5.1 (RACMO22E)                             |                                         |                |                   |                             |                                       |                                              |                |                   |                             |                                       |                                    |
| DJF              | 17                                               | 29                                      | 29             | 44                | 28                          | 29                                    | 27                                           | 29             | 28                | 28                          | 29                                    | 27                                 |
|                  |                                                  | +68%                                    | +68%           | +157%             | +63%                        | +67%                                  | +55%                                         | +68%           | +64%              | +64%                        | +67%                                  | +55%                               |
| MAM              | 138                                              | 156                                     | 156            | 154               | 135                         | 160                                   | 159                                          | 156            | 129               | 138                         | 155                                   | 155                                |
|                  |                                                  | +13%                                    | +13%           | +11%              | -3%                         | +16%                                  | +15%                                         | +13%           | -7%               | 0%                          | +12%                                  | +12%                               |
| JJA              | 167                                              | 165                                     | 165            | 180               | 216                         | 210                                   | 229                                          | 165            | 200               | 216                         | 193                                   | 218                                |
|                  |                                                  | -1%                                     | -1%            | +8%               | +29%                        | +26%                                  | +37%                                         | -1%            | +20%              | +29%                        | +15%                                  | +30%                               |
| SON              | 50                                               | 70                                      | 70             | 48                | 70                          | 74                                    | 88                                           | 70             | 67                | 70                          | 71                                    | 85                                 |
|                  |                                                  | +41%                                    | +41%           | -3%               | +41%                        | +48%                                  | +78%                                         | +41%           | +36%              | +41%                        | +42%                                  | +72%                               |
| Annual Total     | 372                                              | 420                                     | 420            | 426               | 449                         | 472                                   | 503                                          | 420            | 425               | 452                         | 447                                   | 484                                |
|                  |                                                  | +13%                                    | +13%           | +14%              | +21%                        | +27%                                  | +35%                                         | +13%           | +14%              | +21%                        | +20%                                  | +30%                               |
| Climate Scenario | RCP 8.5.2 (HIRHAM5)                              |                                         |                |                   |                             |                                       |                                              |                |                   |                             |                                       |                                    |
| DJF              | 17                                               | 23                                      | 23             | 22                | 22                          | 23                                    | 22                                           | 23             | 22                | 22                          | 23                                    | 22                                 |
|                  |                                                  | +35%                                    | +35%           | +30%              | +30%                        | +34%                                  | +27%                                         | +35%           | +31%              | +31%                        | +34%                                  | +27%                               |
| MAM              | 138                                              | 135                                     | 135            | 112               | 116                         | 138                                   | 138                                          | 135            | 112               | 119                         | 134                                   | 135                                |
|                  |                                                  | -2%                                     | -2%            | -19%              | -16%                        | 0%                                    | 0%                                           | -2%            | -19%              | -14%                        | -3%                                   | -2%                                |
| JJA              | 167                                              | 152                                     | 153            | 186               | 199                         | 194                                   | 210                                          | 152            | 185               | 203                         | 180                                   | 202                                |
|                  |                                                  | -9%                                     | -8%            | +11%              | +19%                        | +16%                                  | +26%                                         | -9%            | +11%              | +21%                        | +8%                                   | +21%                               |
| SON              | 50                                               | 65                                      | 65             | 63                | 65                          | 68                                    | 79                                           | 65             | 63                | 65                          | 66                                    | 78                                 |
|                  |                                                  | +32%                                    | +32%           | +27%              | +30%                        | +37%                                  | +59%                                         | +32%           | +26%              | +31%                        | +33%                                  | +57%                               |
| Annual Total     | 372                                              | 377                                     | 377            | 382               | 403                         | 423                                   | 449                                          | 377            | 382               | 410                         | 403                                   | 437                                |
|                  |                                                  | +1%                                     | +1%            | +3%               | +8%                         | +14%                                  | +21%                                         | +1%            | +3%               | +10%                        | +8%                                   | +17%                               |
| Climate Scenario | RCP 8.5.3 (RCA4)                                 |                                         |                |                   |                             |                                       |                                              |                |                   |                             |                                       |                                    |
| DJF              | 17                                               | 34                                      | 34             | 33                | 41                          | 34                                    | 32                                           | 34             | 33                | 33                          | 34                                    | 32                                 |
|                  |                                                  | +100%                                   | +100%          | +93%              | +139%                       | +98%                                  | +84%                                         | +100%          | +93%              | +93%                        | +99%                                  | +85%                               |
| MAM              | 138                                              | 141                                     | 140            | 119               | 139                         | 142                                   | 144                                          | 141            | 119               | 126                         | 139                                   | 141                                |
|                  |                                                  | +2%                                     | +2%            | -14%              | +1%                         | +3%                                   | +4%                                          | +2%            | -14%              | -9%                         | +1%                                   | +2%                                |
| JJA              | 167                                              | 158                                     | 159            | 197               | 203                         | 205                                   | 223                                          | 158            | 197               | 214                         | 188                                   | 211                                |
|                  |                                                  | -5%                                     | -5%            | +18%              | +21%                        | +23%                                  | +34%                                         | -5%            | +18%              | +28%                        | +12%                                  | +27%                               |
| SON              | 50                                               | 72                                      | 73             | 70                | 59                          | 75                                    | 86                                           | 72             | 69                | 72                          | 73                                    | 84                                 |
|                  |                                                  | +46%                                    | +46%           | +40%              | +19%                        | +52%                                  | +74%                                         | +46%           | +40%              | +46%                        | +47%                                  | +70%                               |
| Annual Total     | 372                                              | 406                                     | 406            | 419               | 442                         | 457                                   | 485                                          | 406            | 419               | 445                         | 434                                   | 468                                |
|                  |                                                  | +9%                                     | +9%            | +13%              | +19%                        | +23%                                  | +30%                                         | +9%            | +13%              | +20%                        | +17%                                  | +26%                               |



**Table S9.** Comparison of water withdrawals from irrigation reservoirs for adaptation scenarios V3.3, V3.4, V3.4 in relation to the total amount of water in reservoirs without irrigation (V3.1) in the Bystra catchment from 2041 to 2050 for climate scenarios RCP 4.5 and RCP 8.5. Bold numbers indicate water withdrawals from irrigation reservoirs, and shaded numbers indicate percentage change (red indicates % decrease in content) (author's own study)

| Climate Scenario |                                                                        | RCP 4.5                        |                                          |                                       |                                              | RCP 8.5                        |                                          |                                       |
|------------------|------------------------------------------------------------------------|--------------------------------|------------------------------------------|---------------------------------------|----------------------------------------------|--------------------------------|------------------------------------------|---------------------------------------|
| Time Interval    |                                                                        | 2041-2050                      |                                          |                                       |                                              |                                |                                          |                                       |
| Type of Scenario | Variant 3 - Low Retention<br>More Reservoirs                           |                                |                                          |                                       | Variant 3 - Low Retention<br>More Reservoirs |                                |                                          |                                       |
|                  | Cereals (V3.1)                                                         | Irrigated Vegetables<br>(V3.3) | Irrigated Vegetables +<br>Cereals (V3.4) | Irrigated Orchard +<br>Cereals (V3.5) | Cereals (V3.1)                               | Irrigated Vegetables<br>(V3.3) | Irrigated Vegetables +<br>Cereals (V3.4) | Irrigated Orchard +<br>Cereals (V3.5) |
|                  |                                                                        |                                |                                          |                                       |                                              |                                |                                          |                                       |
| Season           | Total Amount of Water in Reservoirs [m <sup>3</sup> ·10 <sup>4</sup> ] |                                |                                          |                                       |                                              |                                |                                          |                                       |
| DJF              | 1069                                                                   | 1010                           | 1047                                     | 889                                   | 1095                                         | 1068                           | 1084                                     | 1001                                  |
|                  |                                                                        | -5%                            | -2%                                      | -17%                                  |                                              | -2%                            | -1%                                      | -9%                                   |
| MAM              | 1069                                                                   | 931                            | 1020                                     | 908                                   | 1096                                         | 1015                           | 1068                                     | 1002                                  |
|                  |                                                                        | -13%                           | -5%                                      | -15%                                  |                                              | -7%                            | -3%                                      | -9%                                   |
| JJA              | 1059                                                                   | 702                            | 857                                      | 740                                   | 1089                                         | 801                            | 970                                      | 877                                   |
|                  |                                                                        | -34%                           | -19%                                     | -30%                                  |                                              | -26%                           | -11%                                     | -19%                                  |
| SON              | 1065                                                                   | 865                            | 959                                      | 746                                   | 1094                                         | 970                            | 1046                                     | 919                                   |
|                  |                                                                        | -19%                           | -10%                                     | -30%                                  |                                              | -11%                           | -4%                                      | -16%                                  |
| Average Annual   | 1065                                                                   | 877                            | 971                                      | 821                                   | 1094                                         | 963                            | 1042                                     | 950                                   |
|                  |                                                                        | -17.7%                         | -8.9%                                    | -23.0%                                |                                              | -9.6%                          | -2.2%                                    | -10.9%                                |

**Table S10.** Percentage summary of changes in precipitation, soil water content, sediment yield, total runoff and actual evapotranspiration under V1, V2.1 - V2.5, V3.1 - V3.5 in the years 2041-2050 compared to the SWAT 2010-2017 model scenario, for average values of three GCMs/RCMs combinations under two RCP climate change scenarios (RCP 4.5, RCP 8.5). The summary covers four seasons (DJF, MAM, JJA, SON) in the Bystra catchment. Shaded numbers indicate percentage changes (red indicates % decrease in content, and blue indicates % increase in content) (author's own study).

| Season         | RCP 4.5               |                            |                      |                          |                                   | RCP 8.5               |                            |                      |                          |                                   | Type of Scenario |
|----------------|-----------------------|----------------------------|----------------------|--------------------------|-----------------------------------|-----------------------|----------------------------|----------------------|--------------------------|-----------------------------------|------------------|
|                | Precipitation<br>[mm] | Soil Water Content<br>[mm] | Total Runoff<br>[mm] | Sediment Yield<br>[t/ha] | Actual Evapotranspiration<br>[mm] | Precipitation<br>[mm] | Soil Water Content<br>[mm] | Total Runoff<br>[mm] | Sediment Yield<br>[t/ha] | Actual Evapotranspiration<br>[mm] |                  |
| DJF            | -8%                   | -3%                        | -24%                 | -38%                     | +60%                              | +8%                   | -1%                        | +8%                  | -18%                     | +68%                              | V1               |
| MAM            | -4%                   | -4%                        | -23%                 | -36%                     | +6%                               | +13%                  | -1%                        | +9%                  | -15%                     | +4%                               |                  |
| JJA            | -6%                   | -4%                        | -24%                 | +22%                     | -3%                               | +1%                   | 0%                         | +17%                 | +81%                     | -5%                               |                  |
| SON            | +7%                   | -3%                        | -22%                 | +19%                     | +35%                              | +25%                  | 0%                         | +17%                 | +112%                    | +40%                              |                  |
| <b>Average</b> | -3%                   | -3%                        | -23%                 | -14%                     | +8%                               | +11%                  | 0%                         | +13%                 | +29%                     | +8%                               |                  |
| DJF            | -8%                   | -3%                        | -25%                 | -49%                     | +59%                              | +8%                   | -1%                        | +7%                  | -33%                     | +68%                              | V2.1             |
| MAM            | -4%                   | -4%                        | -23%                 | -48%                     | +6%                               | +13%                  | -1%                        | +8%                  | +30%                     | +4%                               |                  |
| JJA            | -6%                   | -5%                        | -25%                 | -2%                      | -3%                               | +1%                   | 0%                         | +16%                 | +47%                     | -5%                               |                  |
| SON            | +7%                   | -3%                        | -23%                 | -2%                      | +35%                              | +25%                  | 0%                         | +16%                 | +73%                     | +40%                              |                  |
| <b>Average</b> | -3%                   | -3%                        | -24%                 | -30%                     | +8%                               | +11%                  | -1%                        | +12%                 | +6%                      | +8%                               |                  |
| DJF            | -8%                   | -3%                        | -27%                 | -25%                     | +53%                              | +8%                   | -1%                        | 0%                   | -23%                     | +93%                              | V2.2             |
| MAM            | -4%                   | 0%                         | -23%                 | +16%                     | -15%                              | +13%                  | +2%                        | +7%                  | +57%                     | -7%                               |                  |
| JJA            | -6%                   | -6%                        | -24%                 | +53%                     | +20%                              | +1%                   | -3%                        | +13%                 | +112%                    | +12%                              |                  |
| SON            | +7%                   | -4%                        | -28%                 | -29%                     | +28%                              | +25%                  | 0%                         | +12%                 | +93%                     | +21%                              |                  |
| <b>Average</b> | -3%                   | -3%                        | -26%                 | -2%                      | +9%                               | +11%                  | -1%                        | +8%                  | +49%                     | +10%                              |                  |
| DJF            | -8%                   | -3%                        | -16%                 | -24%                     | +53%                              | +8%                   | -1%                        | +13%                 | +4%                      | +78%                              | V2.3             |
| MAM            | -4%                   | +1%                        | -14%                 | +22%                     | -10%                              | +13%                  | +1%                        | +15%                 | +57%                     | -6%                               |                  |
| JJA            | -6%                   | -4%                        | -9%                  | +109%                    | +29%                              | +1%                   | -1%                        | +32%                 | +226%                    | +23%                              |                  |
| SON            | +7%                   | -3%                        | -11%                 | 0%                       | +34%                              | +25%                  | 0%                         | +22%                 | +54%                     | +30%                              |                  |
| <b>Average</b> | -3%                   | -2%                        | -13%                 | +16%                     | +16%                              | +11%                  | 0%                         | +20%                 | +67%                     | +16%                              |                  |
| DJF            | -8%                   | -3%                        | -7%                  | -35%                     | +58%                              | +8%                   | -1%                        | +24%                 | -16%                     | +66%                              | V2.4             |
| MAM            | -4%                   | -2%                        | -7%                  | +1%                      | +9%                               | +13%                  | +1%                        | +23%                 | +32%                     | +6%                               |                  |
| JJA            | -6%                   | -1%                        | +3%                  | +97%                     | +26%                              | +1%                   | +2%                        | +40%                 | +147%                    | +22%                              |                  |
| SON            | +7%                   | -2%                        | +4%                  | +0%                      | +42%                              | +25%                  | 0%                         | +40%                 | +54%                     | +46%                              |                  |
| <b>Average</b> | -3%                   | -2%                        | -2%                  | +5%                      | +23%                              | +11%                  | 0%                         | +31%                 | +40%                     | +21%                              |                  |
| DJF            | -8%                   | -3%                        | -4%                  | -86%                     | +49%                              | +8%                   | -1%                        | +26%                 | -80%                     | +55%                              | V2.5             |
| MAM            | -4%                   | -2%                        | -4%                  | -82%                     | +9%                               | +13%                  | +1%                        | +26%                 | -77%                     | +6%                               |                  |
| JJA            | -6%                   | -1%                        | +6%                  | -70%                     | +37%                              | +1%                   | +2%                        | +43%                 | -55%                     | +32%                              |                  |
| SON            | +7%                   | -2%                        | +6%                  | -77%                     | +69%                              | +25%                  | 0%                         | +42%                 | -54%                     | +70%                              |                  |
| <b>Average</b> | -3%                   | -2%                        | 0%                   | -80%                     | +31%                              | +11%                  | 1%                         | +34%                 | -69%                     | +29%                              |                  |
| DJF            | -8%                   | -3%                        | -24%                 | -38%                     | +60%                              | +8%                   | -1%                        | +8%                  | -18%                     | +68%                              | V3.1             |
| MAM            | -4%                   | -4%                        | -23%                 | -36%                     | +6%                               | +13%                  | -1%                        | +9%                  | -15%                     | +4%                               |                  |
| JJA            | -6%                   | -4%                        | -24%                 | +22%                     | -3%                               | +1%                   | 0%                         | +17%                 | +81%                     | -5%                               |                  |
| SON            | +7%                   | -3%                        | -22%                 | +19%                     | +35%                              | +25%                  | 0%                         | +17%                 | +112%                    | +40%                              |                  |
| <b>Average</b> | -3%                   | -3%                        | -23%                 | -14%                     | +8%                               | +11%                  | 0%                         | +13%                 | +29%                     | +8%                               |                  |
| DJF            | -8%                   | -3%                        | -27%                 | -9%                      | +53%                              | +8%                   | -1%                        | +3%                  | +32%                     | +62%                              | V3.2             |
| MAM            | -4%                   | 0%                         | -23%                 | +42%                     | -15%                              | +13%                  | +2%                        | +8%                  | +85%                     | -13%                              |                  |
| JJA            | -6%                   | -6%                        | -24%                 | +84%                     | +20%                              | +1%                   | -3%                        | +14%                 | +160%                    | +16%                              |                  |
| SON            | +7%                   | -4%                        | -27%                 | -13%                     | +28%                              | +25%                  | -1%                        | +10%                 | +101%                    | +34%                              |                  |
| <b>Average</b> | -3%                   | -3%                        | -25%                 | +20%                     | +9%                               | +11%                  | -1%                        | +9%                  | +84%                     | +10%                              |                  |
| DJF            | -8%                   | -3%                        | -18%                 | -9%                      | +53%                              | +8%                   | -1%                        | +14%                 | +33%                     | +62%                              | V3.3             |
| MAM            | -4%                   | +1%                        | -15%                 | +46%                     | -8%                               | +13%                  | +3%                        | +17%                 | +93%                     | -8%                               |                  |
| JJA            | -6%                   | -4%                        | -11%                 | +116%                    | +28%                              | +1%                   | -1%                        | +30%                 | +197%                    | +26%                              |                  |
| SON            | +7%                   | -3%                        | -14%                 | +1%                      | +33%                              | +25%                  | 0%                         | +25%                 | +112%                    | +39%                              |                  |
| <b>Average</b> | -3%                   | -2%                        | -15%                 | +29%                     | +16%                              | +11%                  | 0%                         | +21%                 | +95%                     | +17%                              |                  |
| DJF            | -8%                   | -3%                        | -21%                 | -23%                     | +58%                              | +8%                   | -1%                        | +11%                 | +2%                      | +67%                              | V3.4             |
| MAM            | -4%                   | -2%                        | -20%                 | +14%                     | +5%                               | +13%                  | 0%                         | +13%                 | +51%                     | +3%                               |                  |
| JJA            | -6%                   | -5%                        | -18%                 | +62%                     | +14%                              | +1%                   | -1%                        | +23%                 | +126%                    | +12%                              |                  |
| SON            | +7%                   | -3%                        | -18%                 | -13%                     | +35%                              | +25%                  | 0%                         | +22%                 | +64%                     | +41%                              |                  |
| <b>Average</b> | -3%                   | -3%                        | -19%                 | +4%                      | +16%                              | +11%                  | 0%                         | +17%                 | +50%                     | +15%                              |                  |
| DJF            | -8%                   | -9%                        | -35%                 | -83%                     | +49%                              | +8%                   | -4%                        | -3%                  | -76%                     | +56%                              | V3.5             |
| MAM            | -4%                   | -7%                        | -33%                 | -78%                     | +5%                               | +13%                  | -1%                        | 0%                   | -72%                     | +4%                               |                  |
| JJA            | -6%                   | -13%                       | -34%                 | -64%                     | +29%                              | +1%                   | -6%                        | +9%                  | -43%                     | +26%                              |                  |
| SON            | +7%                   | -14%                       | -34%                 | -71%                     | +62%                              | +25%                  | -7%                        | +7%                  | -44%                     | +66%                              |                  |
| <b>Average</b> | -3%                   | -11%                       | -34%                 | -76%                     | +26%                              | +11%                  | -5%                        | +3%                  | -62%                     | +24%                              |                  |

**Table S11.** Comparison of average water flowout from the selected sub-catchments (1, 4, 9, 10, 22, 31) by season between Variant 1 (V1 - BaU) and Variants 2.1 and 3.1 for the years 2041-2050 in the Bystra catchment for climate scenarios RCP 4.5 and RCP 8.5. Bold numbers indicate outflow (m<sup>3</sup>/s) and shaded numbers indicate percentage change. Shade of red indicates % decrease in content and shade of blue indicates % increase in content (author's own elaboration).

| Climate scenario |                                    | RCP 4.5                                             |                                                          |  |                                    | RCP 8.5                                               |                                                            |  |  |
|------------------|------------------------------------|-----------------------------------------------------|----------------------------------------------------------|--|------------------------------------|-------------------------------------------------------|------------------------------------------------------------|--|--|
| Time interval    |                                    | 2041-2050                                           |                                                          |  |                                    |                                                       |                                                            |  |  |
| Type of scenario | Variant 1 only climate change (V1) | Variant 2 - low retention more ponds cereals (V2.1) | Variant 3 - low retention more reservoirs cereals (V3.1) |  | Variant 1 only climate change (V1) | Variant 2 - low retention more ponds - cereals (V2.1) | Variant 3 - low retention more reservoirs - cereals (V3.1) |  |  |
|                  |                                    |                                                     |                                                          |  |                                    |                                                       |                                                            |  |  |
|                  |                                    |                                                     |                                                          |  |                                    |                                                       |                                                            |  |  |
|                  |                                    |                                                     |                                                          |  |                                    |                                                       |                                                            |  |  |
|                  |                                    |                                                     |                                                          |  |                                    |                                                       |                                                            |  |  |
| Season           |                                    | Flow out [m³/s] - subbasin 1                        |                                                          |  |                                    |                                                       |                                                            |  |  |
| DJF              | 0.07                               | 0.07<br>+7.4%                                       | 0.07<br>0.0%                                             |  | 0.10                               | 0.10<br>+7.5%                                         | 0.10<br>0.0%                                               |  |  |
| MAM              | 0.07                               | 0.07<br>-1.4%                                       | 0.07<br>0.0%                                             |  | 0.10                               | 0.09<br>-2.1%                                         | 0.10<br>0.0%                                               |  |  |
| JJA              | 0.06                               | 0.06<br>-3.2%                                       | 0.06<br>0.0%                                             |  | 0.09                               | 0.09<br>-2.9%                                         | 0.09<br>0.0%                                               |  |  |
| SON              | 0.06                               | 0.06<br>-1.6%                                       | 0.06<br>0.0%                                             |  | 0.09                               | 0.09<br>-1.7%                                         | 0.09<br>0.0%                                               |  |  |
| Average annual   | 0.07                               | 0.07<br>+0.4%                                       | 0.07<br>0.0%                                             |  | 0.09                               | 0.09<br>+0.3%                                         | 0.09<br>0.0%                                               |  |  |
| Climate scenario |                                    | RCP 4.5                                             |                                                          |  |                                    | RCP 8.5                                               |                                                            |  |  |
| Time interval    |                                    | 2041-2050                                           |                                                          |  |                                    |                                                       |                                                            |  |  |
| Type of scenario | Variant 1 only climate change (V1) | Variant 2 - low retention more ponds cereals (V2.1) | Variant 3 - low retention more reservoirs cereals (V3.1) |  | Variant 1 only climate change (V1) | Variant 2 - low retention more ponds - cereals (V2.1) | Variant 3 - low retention more reservoirs - cereals (V3.1) |  |  |
|                  |                                    |                                                     |                                                          |  |                                    |                                                       |                                                            |  |  |
|                  |                                    |                                                     |                                                          |  |                                    |                                                       |                                                            |  |  |
|                  |                                    |                                                     |                                                          |  |                                    |                                                       |                                                            |  |  |
|                  |                                    |                                                     |                                                          |  |                                    |                                                       |                                                            |  |  |
| Season           |                                    | Flow out [m³/s] - subbasin 9                        |                                                          |  |                                    |                                                       |                                                            |  |  |
| DJF              | 0.61                               | 0.64<br>+5.0%                                       | 0.61<br>+0.9%                                            |  | 0.86                               | 0.90<br>+5.1%                                         | 0.87<br>+0.9%                                              |  |  |
| MAM              | 0.60                               | 0.60<br>-0.7%                                       | 0.60<br>+0.5%                                            |  | 0.84                               | 0.83<br>-0.7%                                         | 0.84<br>+0.7%                                              |  |  |
| JJA              | 0.54                               | 0.53<br>-2.0%                                       | 0.54<br>+0.2%                                            |  | 0.79                               | 0.77<br>-1.7%                                         | 0.79<br>+0.3%                                              |  |  |
| SON              | 0.56                               | 0.55<br>-2.3%                                       | 0.56<br>+0.9%                                            |  | 0.84                               | 0.82<br>-2.3%                                         | 0.84<br>+1.1%                                              |  |  |
| Average annual   | 0.58                               | 0.58<br>+0.1%                                       | 0.58<br>+0.6%                                            |  | 0.83                               | 0.83<br>+0.2%                                         | 0.84<br>+0.8%                                              |  |  |
| Climate scenario |                                    | RCP 4.5                                             |                                                          |  |                                    | RCP 8.5                                               |                                                            |  |  |
| Time interval    |                                    | 2041-2050                                           |                                                          |  |                                    |                                                       |                                                            |  |  |
| Type of scenario | Variant 1 only climate change (V1) | Variant 2 - low retention more ponds cereals (V2.1) | Variant 3 - low retention more reservoirs cereals (V3.1) |  | Variant 1 only climate change (V1) | Variant 2 - low retention more ponds - cereals (V2.1) | Variant 3 - low retention more reservoirs - cereals (V3.1) |  |  |
|                  |                                    |                                                     |                                                          |  |                                    |                                                       |                                                            |  |  |
|                  |                                    |                                                     |                                                          |  |                                    |                                                       |                                                            |  |  |
|                  |                                    |                                                     |                                                          |  |                                    |                                                       |                                                            |  |  |
|                  |                                    |                                                     |                                                          |  |                                    |                                                       |                                                            |  |  |
| Season           |                                    | Flow out [m³/s] - subbasin 22                       |                                                          |  |                                    |                                                       |                                                            |  |  |
| DJF              | 1.19                               | 1.23<br>+3.4%                                       | 1.20<br>+0.7%                                            |  | 1.66                               | 1.69<br>+2.0%                                         | 1.68<br>+1.3%                                              |  |  |
| MAM              | 1.21                               | 1.22<br>1.0%                                        | 1.22<br>+0.9%                                            |  | 1.72                               | 1.74<br>1.3%                                          | 1.72<br>+0.4%                                              |  |  |
| JJA              | 1.10                               | 1.08<br>-1.7%                                       | 1.11<br>+0.6%                                            |  | 1.63                               | 1.60<br>-1.7%                                         | 1.64<br>+0.9%                                              |  |  |
| SON              | 1.11                               | 1.07<br>-3.0%                                       | 1.11<br>+0.6%                                            |  | 1.64                               | 1.61<br>-1.6%                                         | 1.64<br>+0.6%                                              |  |  |
| Average annual   | 1.15                               | 1.15<br>0.0%                                        | 1.16<br>+0.7%                                            |  | 1.66                               | 1.66<br>+0.1%                                         | 1.67<br>+0.8%                                              |  |  |
| Climate scenario |                                    | RCP 4.5                                             |                                                          |  |                                    | RCP 8.5                                               |                                                            |  |  |
| Time interval    |                                    | 2041-2050                                           |                                                          |  |                                    |                                                       |                                                            |  |  |
| Type of scenario | Variant 1 only climate change (V1) | Variant 2 - low retention more ponds cereals (V2.1) | Variant 3 - low retention more reservoirs cereals (V3.1) |  | Variant 1 only climate change (V1) | Variant 2 - low retention more ponds - cereals (V2.1) | Variant 3 - low retention more reservoirs - cereals (V3.1) |  |  |
|                  |                                    |                                                     |                                                          |  |                                    |                                                       |                                                            |  |  |
|                  |                                    |                                                     |                                                          |  |                                    |                                                       |                                                            |  |  |
|                  |                                    |                                                     |                                                          |  |                                    |                                                       |                                                            |  |  |
|                  |                                    |                                                     |                                                          |  |                                    |                                                       |                                                            |  |  |
| Season           |                                    | Flow out [m³/s] - subbasin 10                       |                                                          |  |                                    |                                                       |                                                            |  |  |
| DJF              | 0.21                               | 0.22<br>+6.1%                                       | 0.21<br>0.0%                                             |  | 0.29                               | 0.31<br>+6.4%                                         | 0.29<br>0.0%                                               |  |  |
| MAM              | 0.20                               | 0.20<br>-1.3%                                       | 0.20<br>0.0%                                             |  | 0.28                               | 0.27<br>-1.8%                                         | 0.28<br>0.0%                                               |  |  |
| JJA              | 0.17                               | 0.17<br>-2.9%                                       | 0.17<br>0.0%                                             |  | 0.26                               | 0.25<br>-2.8%                                         | 0.26<br>0.0%                                               |  |  |
| SON              | 0.19                               | 0.18<br>-2.4%                                       | 0.19<br>0.0%                                             |  | 0.28                               | 0.27<br>-2.3%                                         | 0.28<br>0.0%                                               |  |  |
| Average annual   | 0.19                               | 0.19<br>+0.1%                                       | 0.19<br>0.0%                                             |  | 0.28                               | 0.28<br>+0.0%                                         | 0.28<br>0.0%                                               |  |  |
| Climate scenario |                                    | RCP 4.5                                             |                                                          |  |                                    | RCP 8.5                                               |                                                            |  |  |
| Time interval    |                                    | 2041-2050                                           |                                                          |  |                                    |                                                       |                                                            |  |  |
| Type of scenario | Variant 1 only climate change (V1) | Variant 2 - low retention more ponds cereals (V2.1) | Variant 3 - low retention more reservoirs cereals (V3.1) |  | Variant 1 only climate change (V1) | Variant 2 - low retention more ponds - cereals (V2.1) | Variant 3 - low retention more reservoirs - cereals (V3.1) |  |  |
|                  |                                    |                                                     |                                                          |  |                                    |                                                       |                                                            |  |  |
|                  |                                    |                                                     |                                                          |  |                                    |                                                       |                                                            |  |  |
|                  |                                    |                                                     |                                                          |  |                                    |                                                       |                                                            |  |  |
|                  |                                    |                                                     |                                                          |  |                                    |                                                       |                                                            |  |  |
| Season           |                                    | Flow out [m³/s] - subbasin 31                       |                                                          |  |                                    |                                                       |                                                            |  |  |
| DJF              | 1.55                               | 1.62<br>+4.6%                                       | 1.58<br>+2.0%                                            |  | 2.21                               | 2.25<br>+1.8%                                         | 2.24<br>+1.6%                                              |  |  |
| MAM              | 1.62                               | 1.62<br>-0.1%                                       | 1.63<br>+0.9%                                            |  | 2.25                               | 2.26<br>+0.4%                                         | 2.24<br>0.0%                                               |  |  |
| JJA              | 1.44                               | 1.42<br>-1.8%                                       | 1.44<br>+0.1%                                            |  | 2.17                               | 2.15<br>-1.0%                                         | 2.19<br>+1.0%                                              |  |  |
| SON              | 1.45                               | 1.40<br>-3.2%                                       | 1.46<br>+0.8%                                            |  | 2.14                               | 2.11<br>-1.5%                                         | 2.17<br>+1.6%                                              |  |  |
| Average annual   | 1.51                               | 1.51<br>-0.1%                                       | 1.53<br>+0.9%                                            |  | 2.19                               | 2.19<br>0.0%                                          | 2.21<br>+1.0%                                              |  |  |

**Table S12.** Comparison of average sediment outflow from the selected sub-catchments (1, 4, 9, 10, 22, 31) by season between Variant 1 (V1 - BaU) and Variants 2.1 and 3.1 for the years 2041-2050 in the Bystra catchment for climate scenarios RCP 4.5 and RCP 8.5. Bold numbers indicate sediment outflow (metric tonnes) and shaded numbers indicate percentage change. Shade of red indicates % decrease in content and shade of blue indicates % increase in content (author's own elaboration).

| Climate scenario |                                    | RCP 4.5                                               |                                                            |             | RCP 8.5                            |                                                       |                                                            |            |
|------------------|------------------------------------|-------------------------------------------------------|------------------------------------------------------------|-------------|------------------------------------|-------------------------------------------------------|------------------------------------------------------------|------------|
| Time interval    |                                    | 2041-2050                                             |                                                            |             |                                    |                                                       |                                                            |            |
| Type of scenario | Variant 1 only climate change (V1) | Variant 2 - low retention more ponds - cereals (V2.1) | Variant 3 - low retention more reservoirs - cereals (V3.1) |             | Variant 1 only climate change (V1) | Variant 2 - low retention more ponds - cereals (V2.1) | Variant 3 - low retention more reservoirs - cereals (V3.1) |            |
|                  |                                    | Sediment outflow [metric tons] - subbasin 1           |                                                            |             |                                    |                                                       |                                                            |            |
|                  |                                    | DJF                                                   | 156                                                        | 126<br>-20% | 156<br>0%                          | 194                                                   | 156<br>-20%                                                | 194<br>0%  |
|                  |                                    | MAM                                                   | 133                                                        | 106<br>-20% | 133<br>0%                          | 184                                                   | 147<br>-20%                                                | 184<br>0%  |
|                  |                                    | JJA                                                   | 124                                                        | 99<br>-20%  | 124<br>0%                          | 196                                                   | 157<br>-20%                                                | 196<br>0%  |
| SON              | 212                                | 169<br>-20%                                           | 212<br>0%                                                  | 287         | 229<br>-20%                        | 287<br>0%                                             |                                                            |            |
| Total annual     | 625                                | 500<br>-20%                                           | 625<br>0%                                                  | 860         | 689<br>-20%                        | 860<br>0%                                             |                                                            |            |
| Climate scenario |                                    | RCP 4.5                                               |                                                            |             | RCP 8.5                            |                                                       |                                                            |            |
| Time interval    |                                    | 2041-2050                                             |                                                            |             |                                    |                                                       |                                                            |            |
| Type of scenario | Variant 1 only climate change (V1) | Variant 2 - low retention more ponds - cereals (V2.1) | Variant 3 - low retention more reservoirs - cereals (V3.1) |             | Variant 1 only climate change (V1) | Variant 2 - low retention more ponds - cereals (V2.1) | Variant 3 - low retention more reservoirs - cereals (V3.1) |            |
|                  |                                    | Sediment outflow [metric tons] - subbasin 9           |                                                            |             |                                    |                                                       |                                                            |            |
|                  |                                    | DJF                                                   | 184                                                        | 198<br>+7%  | 187<br>+1%                         | 291                                                   | 311<br>+7%                                                 | 294<br>+1% |
|                  |                                    | MAM                                                   | 188                                                        | 187<br>-1%  | 189<br>+1%                         | 288                                                   | 285<br>-1%                                                 | 291<br>+1% |
|                  |                                    | JJA                                                   | 163                                                        | 159<br>-2%  | 163<br>+1%                         | 266                                                   | 261<br>-2%                                                 | 267<br>+1% |
| SON              | 169                                | 164<br>-3%                                            | 171<br>+1%                                                 | 287         | 278<br>-3%                         | 291<br>+2%                                            |                                                            |            |
| Total annual     | 704                                | 707<br>0%                                             | 711<br>+1%                                                 | 1131        | 1135<br>0%                         | 1143<br>+1%                                           |                                                            |            |
| Climate scenario |                                    | RCP 4.5                                               |                                                            |             | RCP 8.5                            |                                                       |                                                            |            |
| Time interval    |                                    | 2041-2050                                             |                                                            |             |                                    |                                                       |                                                            |            |
| Type of scenario | Variant 1 only climate change (V1) | Variant 2 - low retention more ponds - cereals (V2.1) | Variant 3 - low retention more reservoirs - cereals (V3.1) |             | Variant 1 only climate change (V1) | Variant 2 - low retention more ponds - cereals (V2.1) | Variant 3 - low retention more reservoirs - cereals (V3.1) |            |
|                  |                                    | Sediment outflow [metric tons] - subbasin 22          |                                                            |             |                                    |                                                       |                                                            |            |
|                  |                                    | DJF                                                   | 418                                                        | 430<br>+3%  | 420<br>+1%                         | 564                                                   | 566<br>0%                                                  | 568<br>+1% |
|                  |                                    | MAM                                                   | 439                                                        | 444<br>+1%  | 443<br>+1%                         | 605                                                   | 614<br>+1%                                                 | 603<br>0%  |
|                  |                                    | JJA                                                   | 391                                                        | 383<br>-2%  | 395<br>+1%                         | 586                                                   | 577<br>-1%                                                 | 588<br>0%  |
| SON              | 392                                | 376<br>-4%                                            | 396<br>+1%                                                 | 574         | 574<br>0%                          | 573<br>0%                                             |                                                            |            |
| Total annual     | 1639                               | 1634<br>0%                                            | 1653<br>+1%                                                | 2329        | 2330<br>0%                         | 2333<br>0%                                            |                                                            |            |

| Climate scenario |                                    | RCP 4.5                                               |                                                            |             | RCP 8.5                            |                                                       |                                                            |             |
|------------------|------------------------------------|-------------------------------------------------------|------------------------------------------------------------|-------------|------------------------------------|-------------------------------------------------------|------------------------------------------------------------|-------------|
| Time interval    |                                    | 2041-2050                                             |                                                            |             |                                    |                                                       |                                                            |             |
| Type of scenario | Variant 1 only climate change (V1) | Variant 2 - low retention more ponds - cereals (V2.1) | Variant 3 - low retention more reservoirs - cereals (V3.1) |             | Variant 1 only climate change (V1) | Variant 2 - low retention more ponds - cereals (V2.1) | Variant 3 - low retention more reservoirs - cereals (V3.1) |             |
|                  |                                    | Sediment outflow [metric tons] - subbasin 4           |                                                            |             |                                    |                                                       |                                                            |             |
|                  |                                    | DJF                                                   | 187                                                        | 159<br>-15% | 187<br>0%                          | 256                                                   | 218<br>-15%                                                | 256<br>0%   |
|                  |                                    | MAM                                                   | 172                                                        | 147<br>-15% | 172<br>0%                          | 257                                                   | 216<br>-16%                                                | 257<br>0%   |
|                  |                                    | JJA                                                   | 206                                                        | 176<br>-15% | 206<br>0%                          | 323                                                   | 278<br>-14%                                                | 323<br>0%   |
| SON              | 299                                | 254<br>-15%                                           | 299<br>0%                                                  | 414         | 353<br>-15%                        | 414<br>0%                                             |                                                            |             |
| Total annual     | 864                                | 736<br>-15%                                           | 864<br>0%                                                  | 1250        | 1064<br>-15%                       | 1250<br>0%                                            |                                                            |             |
| Climate scenario |                                    | RCP 4.5                                               |                                                            |             | RCP 8.5                            |                                                       |                                                            |             |
| Time interval    |                                    | 2041-2050                                             |                                                            |             |                                    |                                                       |                                                            |             |
| Type of scenario | Variant 1 only climate change (V1) | Variant 2 - low retention more ponds - cereals (V2.1) | Variant 3 - low retention more reservoirs - cereals (V3.1) |             | Variant 1 only climate change (V1) | Variant 2 - low retention more ponds - cereals (V2.1) | Variant 3 - low retention more reservoirs - cereals (V3.1) |             |
|                  |                                    | Sediment outflow [metric tons] - subbasin 10          |                                                            |             |                                    |                                                       |                                                            |             |
|                  |                                    | DJF                                                   | 701                                                        | 590<br>-16% | 701<br>0%                          | 939                                                   | 792<br>-16%                                                | 939<br>0%   |
|                  |                                    | MAM                                                   | 637                                                        | 534<br>-16% | 637<br>0%                          | 853                                                   | 717<br>-16%                                                | 853<br>0%   |
|                  |                                    | JJA                                                   | 712                                                        | 598<br>-16% | 712<br>0%                          | 1040                                                  | 871<br>-16%                                                | 1039<br>0%  |
| SON              | 979                                | 822<br>-16%                                           | 979<br>0%                                                  | 1571        | 1318<br>-16%                       | 1571<br>0%                                            |                                                            |             |
| Total annual     | 3029                               | 2544<br>-16%                                          | 3029<br>0%                                                 | 4402        | 3698<br>-16%                       | 4402<br>0%                                            |                                                            |             |
| Climate scenario |                                    | RCP 4.5                                               |                                                            |             | RCP 8.5                            |                                                       |                                                            |             |
| Time interval    |                                    | 2041-2050                                             |                                                            |             |                                    |                                                       |                                                            |             |
| Type of scenario | Variant 1 only climate change (V1) | Variant 2 - low retention more ponds - cereals (V2.1) | Variant 3 - low retention more reservoirs - cereals (V3.1) |             | Variant 1 only climate change (V1) | Variant 2 - low retention more ponds - cereals (V2.1) | Variant 3 - low retention more reservoirs - cereals (V3.1) |             |
|                  |                                    | Sediment outflow [metric tons] - subbasin 31          |                                                            |             |                                    |                                                       |                                                            |             |
|                  |                                    | DJF                                                   | 566                                                        | 542<br>-4%  | 327<br>-42%                        | 814                                                   | 732<br>-10%                                                | 535<br>-34% |
|                  |                                    | MAM                                                   | 607                                                        | 548<br>-10% | 320<br>-47%                        | 833                                                   | 729<br>-13%                                                | 511<br>-39% |
|                  |                                    | JJA                                                   | 522                                                        | 471<br>-10% | 282<br>-46%                        | 772                                                   | 716<br>-7%                                                 | 479<br>-38% |
| SON              | 547                                | 461<br>-16%                                           | 308<br>-44%                                                | 841         | 689<br>-18%                        | 560<br>-33%                                           |                                                            |             |
| Total annual     | 2241                               | 2022<br>-10%                                          | 1237<br>-45%                                               | 3260        | 2865<br>-12%                       | 2084<br>-36%                                          |                                                            |             |

**Table S13.** Comparison of mean actual evapotranspiration in the selected sub-catchment (1, 4, 9, 10, 22, 31) by season between Variant 1 (V1 - BaU) and Variants 2.1 and 3.1 for the years 2041-2050 in the Bystra catchment for climate scenarios RCP 4.5 and RCP 8.5. Bold numbers indicate actual evapotranspiration (mm) and shaded numbers indicate percentage change. Shade of red indicates % decrease in content and shade of blue indicates % increase in content (author's own elaboration).

| Climate scenario |                                    | RCP 4.5                                             |                                                          |       | RCP 8.5                            |                                                       |                                                            |
|------------------|------------------------------------|-----------------------------------------------------|----------------------------------------------------------|-------|------------------------------------|-------------------------------------------------------|------------------------------------------------------------|
| Time interval    |                                    | 2041-2050                                           |                                                          |       |                                    |                                                       |                                                            |
| Type of scenario | Variant 1 only climate change (V1) | Variant 2 - low retention more ponds cereals (V2.1) | Variant 3 - low retention more reservoirs cereals (V3.1) |       | Variant 1 only climate change (V1) | Variant 2 - low retention more ponds - cereals (V2.1) | Variant 3 - low retention more reservoirs - cereals (V3.1) |
|                  |                                    |                                                     |                                                          |       |                                    |                                                       |                                                            |
|                  |                                    |                                                     |                                                          |       |                                    |                                                       |                                                            |
|                  |                                    |                                                     |                                                          |       |                                    |                                                       |                                                            |
|                  |                                    |                                                     |                                                          |       |                                    |                                                       |                                                            |
| Season           |                                    | Actual evapotranspiration [mm] - subbasin 1         |                                                          |       |                                    |                                                       |                                                            |
| DJF              | 29.0                               | 29.0<br>0.00%                                       | 29.0<br>0.00%                                            | 30.5  | 30.5<br>0.00%                      | 30.5<br>0.00%                                         |                                                            |
| MAM              | 154.8                              | 154.8<br>0.00%                                      | 154.8<br>0.00%                                           | 151.6 | 151.6<br>0.00%                     | 151.6<br>0.00%                                        |                                                            |
| JJA              | 151.6                              | 151.6<br>0.00%                                      | 151.6<br>0.00%                                           | 149.7 | 149.7<br>0.00%                     | 149.7<br>0.00%                                        |                                                            |
| SON              | 66.8                               | 66.8<br>0.00%                                       | 66.8<br>0.00%                                            | 70.0  | 70.0<br>0.00%                      | 70.0<br>0.00%                                         |                                                            |
| Total annual     | 402.2                              | 402.2<br>0.00%                                      | 402.2<br>0.00%                                           | 401.8 | 401.8<br>0.00%                     | 401.8<br>0.00%                                        |                                                            |
| Climate scenario |                                    | RCP 4.5                                             |                                                          |       | RCP 8.5                            |                                                       |                                                            |
| Time interval    |                                    | 2041-2050                                           |                                                          |       |                                    |                                                       |                                                            |
| Type of scenario | Variant 1 only climate change (V1) | Variant 2 - low retention more ponds cereals (V2.1) | Variant 3 - low retention more reservoirs cereals (V3.1) |       | Variant 1 only climate change (V1) | Variant 2 - low retention more ponds - cereals (V2.1) | Variant 3 - low retention more reservoirs - cereals (V3.1) |
|                  |                                    |                                                     |                                                          |       |                                    |                                                       |                                                            |
|                  |                                    |                                                     |                                                          |       |                                    |                                                       |                                                            |
|                  |                                    |                                                     |                                                          |       |                                    |                                                       |                                                            |
|                  |                                    |                                                     |                                                          |       |                                    |                                                       |                                                            |
| Season           |                                    | Actual evapotranspiration [mm] - subbasin 9         |                                                          |       |                                    |                                                       |                                                            |
| DJF              | 28.0                               | 27.9<br>-0.10%                                      | 28.0<br>+0.04%                                           | 29.5  | 29.5<br>-0.09%                     | 29.5<br>+0.03%                                        |                                                            |
| MAM              | 143.5                              | 143.2<br>-0.21%                                     | 143.6<br>+0.08%                                          | 141.8 | 141.5<br>-0.19%                    | 141.9<br>+0.07%                                       |                                                            |
| JJA              | 172.2                              | 172.8<br>+0.33%                                     | 172.0<br>-0.12%                                          | 168.2 | 168.7<br>+0.30%                    | 168.0<br>-0.11%                                       |                                                            |
| SON              | 68.9                               | 68.9<br>+0.08%                                      | 68.8<br>-0.03%                                           | 71.5  | 71.6<br>+0.06%                     | 71.5<br>-0.02%                                        |                                                            |
| Total annual     | 412.5                              | 412.8<br>+0.07%                                     | 412.4<br>-0.02%                                          | 411.0 | 411.3<br>+0.06%                    | 410.9<br>-0.02%                                       |                                                            |
| Climate scenario |                                    | RCP 4.5                                             |                                                          |       | RCP 8.5                            |                                                       |                                                            |
| Time interval    |                                    | 2041-2050                                           |                                                          |       |                                    |                                                       |                                                            |
| Type of scenario | Variant 1 only climate change (V1) | Variant 2 - low retention more ponds cereals (V2.1) | Variant 3 - low retention more reservoirs cereals (V3.1) |       | Variant 1 only climate change (V1) | Variant 2 - low retention more ponds - cereals (V2.1) | Variant 3 - low retention more reservoirs - cereals (V3.1) |
|                  |                                    |                                                     |                                                          |       |                                    |                                                       |                                                            |
|                  |                                    |                                                     |                                                          |       |                                    |                                                       |                                                            |
|                  |                                    |                                                     |                                                          |       |                                    |                                                       |                                                            |
|                  |                                    |                                                     |                                                          |       |                                    |                                                       |                                                            |
| Season           |                                    | Actual evapotranspiration [mm] - subbasin 10        |                                                          |       |                                    |                                                       |                                                            |
| DJF              | 28.6                               | 28.6<br>0.00%                                       | 28.6<br>0.00%                                            | 30.1  | 30.1<br>0.00%                      | 30.1<br>0.00%                                         |                                                            |
| MAM              | 149.6                              | 149.6<br>0.01%                                      | 149.6<br>0.00%                                           | 146.6 | 146.6<br>0.01%                     | 146.6<br>0.00%                                        |                                                            |
| JJA              | 144.1                              | 144.1<br>0.01%                                      | 144.1<br>0.00%                                           | 140.1 | 140.2<br>0.01%                     | 140.1<br>0.00%                                        |                                                            |
| SON              | 64.6                               | 64.6<br>0.01%                                       | 64.6<br>0.00%                                            | 67.3  | 67.3<br>0.01%                      | 67.3<br>0.00%                                         |                                                            |
| Total annual     | 387.0                              | 387.0<br>0.01%                                      | 387.0<br>0.00%                                           | 384.1 | 384.1<br>0.01%                     | 384.1<br>0.00%                                        |                                                            |
| Climate scenario |                                    | RCP 4.5                                             |                                                          |       | RCP 8.5                            |                                                       |                                                            |
| Time interval    |                                    | 2041-2050                                           |                                                          |       |                                    |                                                       |                                                            |
| Type of scenario | Variant 1 only climate change (V1) | Variant 2 - low retention more ponds cereals (V2.1) | Variant 3 - low retention more reservoirs cereals (V3.1) |       | Variant 1 only climate change (V1) | Variant 2 - low retention more ponds - cereals (V2.1) | Variant 3 - low retention more reservoirs - cereals (V3.1) |
|                  |                                    |                                                     |                                                          |       |                                    |                                                       |                                                            |
|                  |                                    |                                                     |                                                          |       |                                    |                                                       |                                                            |
|                  |                                    |                                                     |                                                          |       |                                    |                                                       |                                                            |
|                  |                                    |                                                     |                                                          |       |                                    |                                                       |                                                            |
| Season           |                                    | Actual evapotranspiration [mm] - subbasin 22        |                                                          |       |                                    |                                                       |                                                            |
| DJF              | 23.9                               | 23.9<br>0.00%                                       | 23.9<br>0.00%                                            | 25.2  | 25.2<br>0.00%                      | 25.2<br>0.00%                                         |                                                            |
| MAM              | 117.8                              | 117.8<br>0.00%                                      | 117.8<br>0.00%                                           | 120.2 | 120.2<br>0.00%                     | 120.2<br>0.00%                                        |                                                            |
| JJA              | 211.7                              | 211.7<br>0.00%                                      | 211.7<br>0.00%                                           | 204.6 | 204.6<br>0.00%                     | 204.6<br>0.00%                                        |                                                            |
| SON              | 69.1                               | 69.1<br>0.00%                                       | 69.1<br>0.00%                                            | 70.5  | 70.5<br>0.00%                      | 70.5<br>0.00%                                         |                                                            |
| Total annual     | 422.6                              | 422.6<br>0.00%                                      | 422.6<br>0.00%                                           | 420.5 | 420.5<br>0.00%                     | 420.5<br>0.00%                                        |                                                            |
| Climate scenario |                                    | RCP 4.5                                             |                                                          |       | RCP 8.5                            |                                                       |                                                            |
| Time interval    |                                    | 2041-2050                                           |                                                          |       |                                    |                                                       |                                                            |
| Type of scenario | Variant 1 only climate change (V1) | Variant 2 - low retention more ponds cereals (V2.1) | Variant 3 - low retention more reservoirs cereals (V3.1) |       | Variant 1 only climate change (V1) | Variant 2 - low retention more ponds - cereals (V2.1) | Variant 3 - low retention more reservoirs - cereals (V3.1) |
|                  |                                    |                                                     |                                                          |       |                                    |                                                       |                                                            |
|                  |                                    |                                                     |                                                          |       |                                    |                                                       |                                                            |
|                  |                                    |                                                     |                                                          |       |                                    |                                                       |                                                            |
|                  |                                    |                                                     |                                                          |       |                                    |                                                       |                                                            |
| Season           |                                    | Actual evapotranspiration [mm] - subbasin 31        |                                                          |       |                                    |                                                       |                                                            |
| DJF              | 25.6                               | 25.5<br>-0.15%                                      | 25.5<br>-0.12%                                           | 26.9  | 26.9<br>-0.14%                     | 26.9<br>-0.11%                                        |                                                            |
| MAM              | 137.1                              | 136.7<br>-0.33%                                     | 136.8<br>-0.26%                                          | 136.7 | 136.3<br>-0.28%                    | 136.4<br>-0.22%                                       |                                                            |
| JJA              | 176.5                              | 177.4<br>+0.47%                                     | 177.2<br>+0.37%                                          | 172.3 | 173.1<br>+0.45%                    | 172.9<br>+0.35%                                       |                                                            |
| SON              | 65.8                               | 65.9<br>+0.12%                                      | 65.9<br>+0.09%                                           | 68.0  | 68.1<br>+0.09%                     | 68.1<br>+0.07%                                        |                                                            |
| Total annual     | 405.0                              | 405.4<br>+0.10%                                     | 405.3<br>+0.08%                                          | 404.0 | 404.4<br>+0.10%                    | 404.3<br>+0.08%                                       |                                                            |

**Table S14.** Comparison of average soil water content in the selected sub-catchment (1, 4, 9, 10, 22, 31) by season between Variant 1 (V1 - BaU) and Variants 2.1 and 3.1 for the years 2041-2050 in the Bystra catchment for climate scenarios RCP 4.5 and RCP 8.5. Bold numbers indicate soil water content (mm) and shaded numbers indicate percentage change. Shade of red indicates % decrease in content and shade of blue indicates % increase in content (author's own elaboration).

| Climate scenario |                                    | RCP 4.5                                             |                                                          |  | RCP 8.5                            |                                                       |                                                            |
|------------------|------------------------------------|-----------------------------------------------------|----------------------------------------------------------|--|------------------------------------|-------------------------------------------------------|------------------------------------------------------------|
| Time interval    |                                    | 2041-2050                                           |                                                          |  |                                    |                                                       |                                                            |
| Type of scenario | Variant 1 only climate change (V1) | Variant 2 - low retention more ponds cereals (V2.1) | Variant 3 - low retention more reservoirs cereals (V3.1) |  | Variant 1 only climate change (V1) | Variant 2 - low retention more ponds - cereals (V2.1) | Variant 3 - low retention more reservoirs - cereals (V3.1) |
|                  |                                    |                                                     |                                                          |  |                                    |                                                       |                                                            |
|                  |                                    |                                                     |                                                          |  |                                    |                                                       |                                                            |
|                  |                                    |                                                     |                                                          |  |                                    |                                                       |                                                            |
|                  |                                    |                                                     |                                                          |  |                                    |                                                       |                                                            |
| Season           |                                    | Soil water content [mm] - subbasin 1                |                                                          |  |                                    |                                                       |                                                            |
| DJF              | 355.3                              | 355.3<br>0.00%                                      | 355.3<br>0.00%                                           |  | 357.7                              | 357.7<br>0.00%                                        | 357.7<br>0.00%                                             |
| MAM              | 326.8                              | 326.8<br>0.00%                                      | 326.8<br>0.00%                                           |  | 334.6                              | 334.6<br>0.00%                                        | 334.6<br>0.00%                                             |
| JJA              | 319.0                              | 319.0<br>0.00%                                      | 319.0<br>0.00%                                           |  | 329.9                              | 329.9<br>0.00%                                        | 329.9<br>0.00%                                             |
| SON              | 342.9                              | 342.9<br>0.00%                                      | 342.9<br>0.00%                                           |  | 348.6                              | 348.6<br>0.00%                                        | 348.6<br>0.00%                                             |
| Average annual   | 336.0                              | 336.0<br>0.00%                                      | 336.0<br>0.00%                                           |  | 342.7                              | 342.7<br>0.00%                                        | 342.7<br>0.00%                                             |
| Climate scenario |                                    | RCP 4.5                                             |                                                          |  | RCP 8.5                            |                                                       |                                                            |
| Time interval    |                                    | 2041-2050                                           |                                                          |  |                                    |                                                       |                                                            |
| Type of scenario | Variant 1 only climate change (V1) | Variant 2 - low retention more ponds cereals (V2.1) | Variant 3 - low retention more reservoirs cereals (V3.1) |  | Variant 1 only climate change (V1) | Variant 2 - low retention more ponds - cereals (V2.1) | Variant 3 - low retention more reservoirs - cereals (V3.1) |
|                  |                                    |                                                     |                                                          |  |                                    |                                                       |                                                            |
|                  |                                    |                                                     |                                                          |  |                                    |                                                       |                                                            |
|                  |                                    |                                                     |                                                          |  |                                    |                                                       |                                                            |
|                  |                                    |                                                     |                                                          |  |                                    |                                                       |                                                            |
| Season           |                                    | Soil water content [mm] - subbasin 9                |                                                          |  |                                    |                                                       |                                                            |
| DJF              | 336.2                              | 335.7<br>-0.16%                                     | 336.4<br>+0.05%                                          |  | 340.6                              | 340.2<br>-0.14%                                       | 340.8<br>+0.04%                                            |
| MAM              | 313.9                              | 313.5<br>-0.11%                                     | 314.0<br>+0.03%                                          |  | 321.0                              | 320.6<br>-0.12%                                       | 321.1<br>+0.03%                                            |
| JJA              | 297.4                              | 296.8<br>-0.20%                                     | 297.6<br>+0.06%                                          |  | 308.0                              | 307.4<br>-0.20%                                       | 308.1<br>+0.06%                                            |
| SON              | 320.0                              | 319.4<br>-0.20%                                     | 320.2<br>+0.06%                                          |  | 328.3                              | 327.7<br>-0.17%                                       | 328.4<br>+0.05%                                            |
| Average annual   | 316.9                              | 316.4<br>-0.17%                                     | 317.1<br>+0.05%                                          |  | 324.5                              | 323.9<br>-0.16%                                       | 324.6<br>+0.05%                                            |
| Climate scenario |                                    | RCP 4.5                                             |                                                          |  | RCP 8.5                            |                                                       |                                                            |
| Time interval    |                                    | 2041-2050                                           |                                                          |  |                                    |                                                       |                                                            |
| Type of scenario | Variant 1 only climate change (V1) | Variant 2 - low retention more ponds cereals (V2.1) | Variant 3 - low retention more reservoirs cereals (V3.1) |  | Variant 1 only climate change (V1) | Variant 2 - low retention more ponds - cereals (V2.1) | Variant 3 - low retention more reservoirs - cereals (V3.1) |
|                  |                                    |                                                     |                                                          |  |                                    |                                                       |                                                            |
|                  |                                    |                                                     |                                                          |  |                                    |                                                       |                                                            |
|                  |                                    |                                                     |                                                          |  |                                    |                                                       |                                                            |
|                  |                                    |                                                     |                                                          |  |                                    |                                                       |                                                            |
| Season           |                                    | Soil water content [mm] - subbasin 10               |                                                          |  |                                    |                                                       |                                                            |
| DJF              | 287.1                              | 287.4<br>+0.08%                                     | 287.2<br>0.00%                                           |  | 289.3                              | 289.5<br>+0.08%                                       | 289.3<br>0.00%                                             |
| MAM              | 257.2                              | 257.4<br>+0.09%                                     | 257.2<br>0.00%                                           |  | 265.6                              | 265.9<br>+0.09%                                       | 265.6<br>0.00%                                             |
| JJA              | 248.5                              | 248.8<br>+0.09%                                     | 248.6<br>0.00%                                           |  | 261.0                              | 261.3<br>+0.09%                                       | 261.0<br>0.00%                                             |
| SON              | 274.2                              | 274.4<br>+0.08%                                     | 274.2<br>0.003%                                          |  | 280.2                              | 280.4<br>+0.08%                                       | 280.2<br>0.00%                                             |
| Average annual   | 266.8                              | 267.0<br>+0.08%                                     | 266.8<br>0.00%                                           |  | 274.0                              | 274.3<br>+0.08%                                       | 274.0<br>0.00%                                             |
| Climate scenario |                                    | RCP 4.5                                             |                                                          |  | RCP 8.5                            |                                                       |                                                            |
| Time interval    |                                    | 2041-2050                                           |                                                          |  |                                    |                                                       |                                                            |
| Type of scenario | Variant 1 only climate change (V1) | Variant 2 - low retention more ponds cereals (V2.1) | Variant 3 - low retention more reservoirs cereals (V3.1) |  | Variant 1 only climate change (V1) | Variant 2 - low retention more ponds - cereals (V2.1) | Variant 3 - low retention more reservoirs - cereals (V3.1) |
|                  |                                    |                                                     |                                                          |  |                                    |                                                       |                                                            |
|                  |                                    |                                                     |                                                          |  |                                    |                                                       |                                                            |
|                  |                                    |                                                     |                                                          |  |                                    |                                                       |                                                            |
|                  |                                    |                                                     |                                                          |  |                                    |                                                       |                                                            |
| Season           |                                    | Soil water content [mm] - subbasin 22               |                                                          |  |                                    |                                                       |                                                            |
| DJF              | 342.5                              | 342.1<br>-0.10%                                     | 342.2<br>-0.08%                                          |  | 349.2                              | 349.0<br>-0.06%                                       | 349.0<br>-0.05%                                            |
| MAM              | 321.9                              | 321.8<br>-0.02%                                     | 321.9<br>-0.01%                                          |  | 331.0                              | 330.9<br>-0.02%                                       | 330.9<br>-0.01%                                            |
| JJA              | 298.8                              | 298.4<br>-0.14%                                     | 298.5<br>-0.11%                                          |  | 311.3                              | 310.9<br>-0.14%                                       | 311.0<br>-0.11%                                            |
| SON              | 322.8                              | 322.3<br>-0.17%                                     | 322.4<br>-0.13%                                          |  | 334.4                              | 334.0<br>-0.12%                                       | 334.1<br>-0.09%                                            |
| Average annual   | 321.5                              | 321.2<br>-0.11%                                     | 321.2<br>-0.08%                                          |  | 331.5                              | 331.2<br>-0.08%                                       | 331.2<br>-0.06%                                            |

| Climate scenario |                                    | RCP 4.5                                             |                                                          |  | RCP 8.5                            |                                                       |                                                            |
|------------------|------------------------------------|-----------------------------------------------------|----------------------------------------------------------|--|------------------------------------|-------------------------------------------------------|------------------------------------------------------------|
| Time interval    |                                    | 2041-2050                                           |                                                          |  |                                    |                                                       |                                                            |
| Type of scenario | Variant 1 only climate change (V1) | Variant 2 - low retention more ponds cereals (V2.1) | Variant 3 - low retention more reservoirs cereals (V3.1) |  | Variant 1 only climate change (V1) | Variant 2 - low retention more ponds - cereals (V2.1) | Variant 3 - low retention more reservoirs - cereals (V3.1) |
|                  |                                    |                                                     |                                                          |  |                                    |                                                       |                                                            |
|                  |                                    |                                                     |                                                          |  |                                    |                                                       |                                                            |
|                  |                                    |                                                     |                                                          |  |                                    |                                                       |                                                            |
|                  |                                    |                                                     |                                                          |  |                                    |                                                       |                                                            |
| Season           |                                    | Soil water content [mm] - subbasin 4                |                                                          |  |                                    |                                                       |                                                            |
| DJF              | 355.3                              | 355.3<br>0.00%                                      | 355.3<br>0.00%                                           |  | 357.7                              | 357.7<br>0.00%                                        | 357.7<br>0.00%                                             |
| MAM              | 326.8                              | 326.8<br>0.00%                                      | 326.8<br>0.00%                                           |  | 334.7                              | 334.7<br>0.00%                                        | 334.7<br>0.00%                                             |
| JJA              | 319.0                              | 319.0<br>0.00%                                      | 319.0<br>0.00%                                           |  | 330.0                              | 330.0<br>0.00%                                        | 330.0<br>0.00%                                             |
| SON              | 342.9                              | 342.9<br>0.00%                                      | 342.9<br>0.00%                                           |  | 348.7                              | 348.7<br>0.00%                                        | 348.7<br>0.00%                                             |
| Average annual   | 336.0                              | 336.0<br>0.00%                                      | 336.0<br>0.00%                                           |  | 342.8                              | 342.8<br>0.00%                                        | 342.8<br>0.00%                                             |
| Climate scenario |                                    | RCP 4.5                                             |                                                          |  | RCP 8.5                            |                                                       |                                                            |
| Time interval    |                                    | 2041-2050                                           |                                                          |  |                                    |                                                       |                                                            |
| Type of scenario | Variant 1 only climate change (V1) | Variant 2 - low retention more ponds cereals (V2.1) | Variant 3 - low retention more reservoirs cereals (V3.1) |  | Variant 1 only climate change (V1) | Variant 2 - low retention more ponds - cereals (V2.1) | Variant 3 - low retention more reservoirs - cereals (V3.1) |
|                  |                                    |                                                     |                                                          |  |                                    |                                                       |                                                            |
|                  |                                    |                                                     |                                                          |  |                                    |                                                       |                                                            |
|                  |                                    |                                                     |                                                          |  |                                    |                                                       |                                                            |
|                  |                                    |                                                     |                                                          |  |                                    |                                                       |                                                            |
| Season           |                                    | Soil water content [mm] - subbasin 10               |                                                          |  |                                    |                                                       |                                                            |
| DJF              | 287.1                              | 287.4<br>+0.08%                                     | 287.2<br>0.00%                                           |  | 289.3                              | 289.5<br>+0.08%                                       | 289.3<br>0.00%                                             |
| MAM              | 257.2                              | 257.4<br>+0.09%                                     | 257.2<br>0.00%                                           |  | 265.6                              | 265.9<br>+0.09%                                       | 265.6<br>0.00%                                             |
| JJA              | 248.5                              | 248.8<br>+0.09%                                     | 248.6<br>0.00%                                           |  | 261.0                              | 261.3<br>+0.09%                                       | 261.0<br>0.00%                                             |
| SON              | 274.2                              | 274.4<br>+0.08%                                     | 274.2<br>0.003%                                          |  | 280.2                              | 280.4<br>+0.08%                                       | 280.2<br>0.00%                                             |
| Average annual   | 266.8                              | 267.0<br>+0.08%                                     | 266.8<br>0.00%                                           |  | 274.0                              | 274.3<br>+0.08%                                       | 274.0<br>0.00%                                             |
| Climate scenario |                                    | RCP 4.5                                             |                                                          |  | RCP 8.5                            |                                                       |                                                            |
| Time interval    |                                    | 2041-2050                                           |                                                          |  |                                    |                                                       |                                                            |
| Type of scenario | Variant 1 only climate change (V1) | Variant 2 - low retention more ponds cereals (V2.1) | Variant 3 - low retention more reservoirs cereals (V3.1) |  | Variant 1 only climate change (V1) | Variant 2 - low retention more ponds - cereals (V2.1) | Variant 3 - low retention more reservoirs - cereals (V3.1) |
|                  |                                    |                                                     |                                                          |  |                                    |                                                       |                                                            |
|                  |                                    |                                                     |                                                          |  |                                    |                                                       |                                                            |
|                  |                                    |                                                     |                                                          |  |                                    |                                                       |                                                            |
|                  |                                    |                                                     |                                                          |  |                                    |                                                       |                                                            |
| Season           |                                    | Soil water content [mm] - subbasin 31               |                                                          |  |                                    |                                                       |                                                            |
| DJF              | 324.3                              | 324.3<br>0.00%                                      | 324.3<br>0.00%                                           |  | 339.1                              | 339.1<br>0.00%                                        | 339.1<br>0.00%                                             |
| MAM              | 315.5                              | 315.5<br>0.00%                                      | 315.5<br>0.00%                                           |  | 327.1                              | 327.1<br>0.00%                                        | 327.1<br>0.00%                                             |
| JJA              | 274.3                              | 274.3<br>0.00%                                      | 274.3<br>0.00%                                           |  | 290.2                              | 290.2<br>0.00%                                        | 290.2<br>0.00%                                             |
| SON              | 292.6                              | 292.6<br>0.00%                                      | 292.6<br>0.000%                                          |  | 314.5                              | 314.5<br>0.00%                                        | 314.5<br>0.00%                                             |
| Average annual   | 301.7                              | 301.7<br>0.00%                                      | 301.7<br>0.00%                                           |  | 317.7                              | 317.7<br>0.00%                                        | 317.7<br>0.00%                                             |

**Table S15.** Comparison of mean total runoff in the selected sub-catchment (1, 4, 9, 10, 22, 31) by season between Variant 1 (V1 - BaU) and Variants 2.1 and 3.1 for the years 2041-2050 in the Bystra River catchment for climate scenarios RCP 4.5 and RCP 8.5. Bold numbers indicate total runoff (mm) and shaded numbers indicate percentage change. Shade of red indicates % decrease in content and shade of blue indicates % increase in content (author's own elaboration).

| Climate scenario |                                    | RCP 4.5                                               |                                                            |  | RCP 8.5                            |                                                       |                                                            |
|------------------|------------------------------------|-------------------------------------------------------|------------------------------------------------------------|--|------------------------------------|-------------------------------------------------------|------------------------------------------------------------|
| Time interval    |                                    | 2041-2050                                             |                                                            |  |                                    |                                                       |                                                            |
| Type of scenario | Variant 1 only climate change (V1) | Variant 2 - low retention more ponds - cereals (V2.1) | Variant 3 - low retention more reservoirs - cereals (V3.1) |  | Variant 1 only climate change (V1) | Variant 2 - low retention more ponds - cereals (V2.1) | Variant 3 - low retention more reservoirs - cereals (V3.1) |
|                  |                                    |                                                       |                                                            |  |                                    |                                                       |                                                            |
|                  |                                    |                                                       |                                                            |  |                                    |                                                       |                                                            |
|                  |                                    |                                                       |                                                            |  |                                    |                                                       |                                                            |
|                  |                                    |                                                       |                                                            |  |                                    |                                                       |                                                            |
| Season           |                                    | Total runoff [mm] - subbasin 1                        |                                                            |  |                                    |                                                       |                                                            |
| DJF              | 45.2                               | 44.5<br>-1.55%                                        | 45.2<br>0.00%                                              |  | 63.4                               | 62.4<br>-1.58%                                        | 63.4<br>0.00%                                              |
| MAM              | 44.2                               | 43.5<br>-1.66%                                        | 44.2<br>0.00%                                              |  | 61.8                               | 60.8<br>-1.67%                                        | 61.8<br>0.00%                                              |
| JJA              | 39.0                               | 37.8<br>-3.19%                                        | 39.0<br>0.00%                                              |  | 58.9                               | 57.1<br>-3.09%                                        | 58.9<br>0.00%                                              |
| SON              | 42.1                               | 41.1<br>-2.31%                                        | 42.1<br>0.00%                                              |  | 61.5                               | 60.2<br>-2.17%                                        | 61.5<br>0.00%                                              |
| Total annual     | 170.4                              | 166.8<br>-2.14%                                       | 170.4<br>0.00%                                             |  | 245.7                              | 240.5<br>-2.11%                                       | 245.7<br>0.00%                                             |
| Climate scenario |                                    | RCP 4.5                                               |                                                            |  | RCP 8.5                            |                                                       |                                                            |
| Time interval    |                                    | 2041-2050                                             |                                                            |  |                                    |                                                       |                                                            |
| Type of scenario | Variant 1 only climate change (V1) | Variant 2 - low retention more ponds cereals (V2.1)   | Variant 3 - low retention more reservoirs cereals (V3.1)   |  | Variant 1 only climate change (V1) | Variant 2 - low retention more ponds - cereals (V2.1) | Variant 3 - low retention more reservoirs - cereals (V3.1) |
|                  |                                    |                                                       |                                                            |  |                                    |                                                       |                                                            |
|                  |                                    |                                                       |                                                            |  |                                    |                                                       |                                                            |
|                  |                                    |                                                       |                                                            |  |                                    |                                                       |                                                            |
|                  |                                    |                                                       |                                                            |  |                                    |                                                       |                                                            |
| Season           |                                    | Total runoff [mm] - subbasin 9                        |                                                            |  |                                    |                                                       |                                                            |
| DJF              | 42.3                               | 41.9<br>-0.96%                                        | 42.3<br>+0.06%                                             |  | 60.5                               | 59.9<br>-0.96%                                        | 60.5<br>+0.05%                                             |
| MAM              | 41.8                               | 41.4<br>-1.05%                                        | 41.9<br>+0.05%                                             |  | 59.3                               | 58.8<br>-0.95%                                        | 59.4<br>+0.04%                                             |
| JJA              | 36.6                               | 36.0<br>-1.82%                                        | 36.6<br>+0.05%                                             |  | 56.2                               | 55.3<br>-1.68%                                        | 56.3<br>+0.04%                                             |
| SON              | 39.1                               | 38.6<br>-1.40%                                        | 39.1<br>+0.07%                                             |  | 58.5                               | 57.7<br>-1.30%                                        | 58.5<br>+0.05%                                             |
| Total annual     | 159.9                              | 157.8<br>-1.29%                                       | 160.0<br>+0.06%                                            |  | 234.6                              | 231.7<br>-1.22%                                       | 234.7<br>+0.04%                                            |
| Climate scenario |                                    | RCP 4.5                                               |                                                            |  | RCP 8.5                            |                                                       |                                                            |
| Time interval    |                                    | 2041-2050                                             |                                                            |  |                                    |                                                       |                                                            |
| Type of scenario | Variant 1 only climate change (V1) | Variant 2 - low retention more ponds cereals (V2.1)   | Variant 3 - low retention more reservoirs cereals (V3.1)   |  | Variant 1 only climate change (V1) | Variant 2 - low retention more ponds - cereals (V2.1) | Variant 3 - low retention more reservoirs - cereals (V3.1) |
|                  |                                    |                                                       |                                                            |  |                                    |                                                       |                                                            |
|                  |                                    |                                                       |                                                            |  |                                    |                                                       |                                                            |
|                  |                                    |                                                       |                                                            |  |                                    |                                                       |                                                            |
|                  |                                    |                                                       |                                                            |  |                                    |                                                       |                                                            |
| Season           |                                    | Total runoff [mm] - subbasin 22                       |                                                            |  |                                    |                                                       |                                                            |
| DJF              | 37.4                               | 36.6<br>-2.09%                                        | 37.3<br>-0.23%                                             |  | 53.9                               | 52.8<br>-2.09%                                        | 53.8<br>-0.16%                                             |
| MAM              | 37.9                               | 37.0<br>-2.41%                                        | 37.8<br>-0.19%                                             |  | 53.5                               | 52.4<br>-2.17%                                        | 53.5<br>-0.12%                                             |
| JJA              | 30.9                               | 30.0<br>-2.93%                                        | 30.8<br>-0.23%                                             |  | 47.6                               | 46.4<br>-2.51%                                        | 47.6<br>-0.17%                                             |
| SON              | 33.5                               | 32.6<br>-2.61%                                        | 33.4<br>-0.24%                                             |  | 51.1                               | 49.8<br>-2.62%                                        | 51.0<br>-0.18%                                             |
| Total annual     | 139.7                              | 136.2<br>-2.49%                                       | 139.4<br>-0.22%                                            |  | 206.2                              | 201.4<br>-2.34%                                       | 205.9<br>-0.16%                                            |

| Climate scenario |                                    | RCP 4.5                                             |                                                          |  | RCP 8.5                            |                                                       |                                                            |
|------------------|------------------------------------|-----------------------------------------------------|----------------------------------------------------------|--|------------------------------------|-------------------------------------------------------|------------------------------------------------------------|
| Time interval    |                                    | 2041-2050                                           |                                                          |  |                                    |                                                       |                                                            |
| Type of scenario | Variant 1 only climate change (V1) | Variant 2 - low retention more ponds cereals (V2.1) | Variant 3 - low retention more reservoirs cereals (V3.1) |  | Variant 1 only climate change (V1) | Variant 2 - low retention more ponds - cereals (V2.1) | Variant 3 - low retention more reservoirs - cereals (V3.1) |
|                  |                                    |                                                     |                                                          |  |                                    |                                                       |                                                            |
|                  |                                    |                                                     |                                                          |  |                                    |                                                       |                                                            |
|                  |                                    |                                                     |                                                          |  |                                    |                                                       |                                                            |
|                  |                                    |                                                     |                                                          |  |                                    |                                                       |                                                            |
| Season           |                                    | Total runoff [mm] - subbasin 4                      |                                                          |  |                                    |                                                       |                                                            |
| DJF              | 44.9                               | 44.6<br>-0.76%                                      | 44.9<br>0.00%                                            |  | 63.3                               | 62.8<br>-0.84%                                        | 63.3<br>0.00%                                              |
| MAM              | 44.1                               | 43.7<br>-0.88%                                      | 44.1<br>0.00%                                            |  | 61.5                               | 61.0<br>-0.87%                                        | 61.5<br>0.00%                                              |
| JJA              | 38.5                               | 37.8<br>-1.90%                                      | 38.5<br>0.00%                                            |  | 58.2                               | 57.1<br>-1.85%                                        | 58.2<br>0.00%                                              |
| SON              | 41.9                               | 41.3<br>-1.34%                                      | 41.9<br>0.00%                                            |  | 61.3                               | 60.6<br>-1.25%                                        | 61.3<br>0.00%                                              |
| Total annual     | 169.4                              | 167.4<br>-1.19%                                     | 169.4<br>0.00%                                           |  | 244.3                              | 241.4<br>-1.19%                                       | 244.3<br>0.00%                                             |
| Climate scenario |                                    | RCP 4.5                                             |                                                          |  | RCP 8.5                            |                                                       |                                                            |
| Time interval    |                                    | 2041-2050                                           |                                                          |  |                                    |                                                       |                                                            |
| Type of scenario | Variant 1 only climate change (V1) | Variant 2 - low retention more ponds cereals (V2.1) | Variant 3 - low retention more reservoirs cereals (V3.1) |  | Variant 1 only climate change (V1) | Variant 2 - low retention more ponds - cereals (V2.1) | Variant 3 - low retention more reservoirs - cereals (V3.1) |
|                  |                                    |                                                     |                                                          |  |                                    |                                                       |                                                            |
|                  |                                    |                                                     |                                                          |  |                                    |                                                       |                                                            |
|                  |                                    |                                                     |                                                          |  |                                    |                                                       |                                                            |
|                  |                                    |                                                     |                                                          |  |                                    |                                                       |                                                            |
| Season           |                                    | Total runoff [mm] - subbasin 10                     |                                                          |  |                                    |                                                       |                                                            |
| DJF              | 41.8                               | 41.3<br>-1.16%                                      | 41.8<br>0.00%                                            |  | 58.7                               | 58.0<br>-1.19%                                        | 58.7<br>0.00%                                              |
| MAM              | 41.3                               | 40.8<br>-1.28%                                      | 41.3<br>0.00%                                            |  | 57.2                               | 56.5<br>-1.26%                                        | 57.2<br>0.00%                                              |
| JJA              | 35.3                               | 34.4<br>-2.43%                                      | 35.3<br>0.00%                                            |  | 53.0                               | 51.8<br>-2.27%                                        | 53.0<br>0.00%                                              |
| SON              | 38.0                               | 37.4<br>-1.73%                                      | 38.0<br>0.00%                                            |  | 56.5                               | 55.5<br>-1.78%                                        | 56.5<br>0.00%                                              |
| Total annual     | 156.4                              | 153.8<br>-1.62%                                     | 156.4<br>0.00%                                           |  | 225.4                              | 221.8<br>-1.61%                                       | 225.4<br>0.00%                                             |
| Climate scenario |                                    | RCP 4.5                                             |                                                          |  | RCP 8.5                            |                                                       |                                                            |
| Time interval    |                                    | 2041-2050                                           |                                                          |  |                                    |                                                       |                                                            |
| Type of scenario | Variant 1 only climate change (V1) | Variant 2 - low retention more ponds cereals (V2.1) | Variant 3 - low retention more reservoirs cereals (V3.1) |  | Variant 1 only climate change (V1) | Variant 2 - low retention more ponds - cereals (V2.1) | Variant 3 - low retention more reservoirs - cereals (V3.1) |
|                  |                                    |                                                     |                                                          |  |                                    |                                                       |                                                            |
|                  |                                    |                                                     |                                                          |  |                                    |                                                       |                                                            |
|                  |                                    |                                                     |                                                          |  |                                    |                                                       |                                                            |
|                  |                                    |                                                     |                                                          |  |                                    |                                                       |                                                            |
| Season           |                                    | Total runoff [mm] - subbasin 31                     |                                                          |  |                                    |                                                       |                                                            |
| DJF              | 32.5                               | 29.8<br>-8.38%                                      | 32.5<br>0.00%                                            |  | 51.9                               | 47.8<br>-7.83%                                        | 51.9<br>0.00%                                              |
| MAM              | 34.0                               | 30.9<br>-8.99%                                      | 34.0<br>0.00%                                            |  | 52.0                               | 47.9<br>-8.02%                                        | 52.0<br>0.00%                                              |
| JJA              | 24.3                               | 22.2<br>-8.59%                                      | 24.3<br>0.00%                                            |  | 41.6                               | 38.7<br>-7.06%                                        | 41.6<br>0.00%                                              |
| SON              | 27.2                               | 24.8<br>-8.85%                                      | 27.2<br>0.00%                                            |  | 47.9                               | 43.9<br>-8.21%                                        | 47.9<br>0.00%                                              |
| Total annual     | 118.0                              | 107.7<br>-8.71%                                     | 118.0<br>0.00%                                           |  | 193.4                              | 178.3<br>-7.81%                                       | 193.4<br>0.00%                                             |



**Table S16.** Comparison of average sediment yield in the selected sub-catchment (1, 4, 9, 10, 22, 31) by season between Variant 1 (V1 - BaU) and Variants 2.1 and 3.1 for 2041-2050 in the Bystra catchment for climate scenarios RCP 4.5 and RCP 8.5. Bold numbers indicate sediment yield (t/ha) and shaded numbers indicate percentage change. Shade of red indicates % decrease in content and shade of blue indicates % increase in content (author's own elaboration).

| Climate scenario |                                     | RCP 4.5                                                    |                                                            |                                    |                                                       |                                                            | RCP 8.5                             |                                                       |                                                            |                                    |                                                       |
|------------------|-------------------------------------|------------------------------------------------------------|------------------------------------------------------------|------------------------------------|-------------------------------------------------------|------------------------------------------------------------|-------------------------------------|-------------------------------------------------------|------------------------------------------------------------|------------------------------------|-------------------------------------------------------|
| Time interval    |                                     | 2041-2050                                                  |                                                            |                                    |                                                       |                                                            | 2041-2050                           |                                                       |                                                            |                                    |                                                       |
| Type of scenario | Variant 1 only climate change (V1)  | Variant 2 - low retention more reservoirs - cereals (V2.1) | Variant 3 - low retention more reservoirs - cereals (V3.1) | Variant 1 only climate change (V1) | Variant 2 - low retention more ponds - cereals (V2.1) | Variant 3 - low retention more reservoirs - cereals (V3.1) | Variant 1 only climate change (V1)  | Variant 2 - low retention more ponds - cereals (V2.1) | Variant 3 - low retention more reservoirs - cereals (V3.1) | Variant 1 only climate change (V1) | Variant 2 - low retention more ponds - cereals (V2.1) |
| Season           | Sediment yield [t/ha] - subbasin 1  |                                                            |                                                            |                                    |                                                       |                                                            | Sediment yield [t/ha] - subbasin 4  |                                                       |                                                            |                                    |                                                       |
| DJF              | 0.14                                | 0.11<br>-19.67%                                            | 0.14<br>0.00%                                              | 0.17                               | 0.14<br>-19.53%                                       | 0.17<br>0.00%                                              | 0.06                                | 0.05<br>-15.2%                                        | 0.06<br>0.00%                                              | 0.08                               | 0.07<br>-15.2%                                        |
| MAM              | 0.12                                | 0.09<br>-19.93%                                            | 0.12<br>0.00%                                              | 0.16                               | 0.13<br>-20.08%                                       | 0.16<br>0.00%                                              | 0.06                                | 0.05<br>-15.8%                                        | 0.06<br>0.00%                                              | 0.08                               | 0.07<br>-15.9%                                        |
| JJA              | 0.11                                | 0.09<br>-20.01%                                            | 0.11<br>0.00%                                              | 0.17                               | 0.14<br>-20.03%                                       | 0.17<br>0.00%                                              | 0.07                                | 0.06<br>-15.9%                                        | 0.07<br>0.00%                                              | 0.11                               | 0.09<br>-15.7%                                        |
| SON              | 0.19                                | 0.15<br>-19.92%                                            | 0.19<br>0.00%                                              | 0.25                               | 0.20<br>-19.99%                                       | 0.25<br>0.00%                                              | 0.10                                | 0.08<br>-15.8%                                        | 0.10<br>0.00%                                              | 0.14                               | 0.12<br>-15.8%                                        |
| Total annual     | 0.55                                | 0.44<br>-19.88%                                            | 0.55<br>0.00%                                              | 0.76                               | 0.61<br>-19.92%                                       | 0.76<br>0.00%                                              | 0.28                                | 0.24<br>-15.7%                                        | 0.28<br>0.00%                                              | 0.41                               | 0.35<br>-15.7%                                        |
| Climate scenario |                                     | RCP 4.5                                                    |                                                            |                                    |                                                       |                                                            | RCP 8.5                             |                                                       |                                                            |                                    |                                                       |
| Time interval    |                                     | 2041-2050                                                  |                                                            |                                    |                                                       |                                                            | 2041-2050                           |                                                       |                                                            |                                    |                                                       |
| Type of scenario | Variant 1 only climate change (V1)  | Variant 2 - low retention more ponds cereals (V2.1)        | Variant 3 - low retention more reservoirs cereals (V3.1)   | Variant 1 only climate change (V1) | Variant 2 - low retention more ponds - cereals (V2.1) | Variant 3 - low retention more reservoirs - cereals (V3.1) | Variant 1 only climate change (V1)  | Variant 2 - low retention more ponds cereals (V2.1)   | Variant 3 - low retention more reservoirs cereals (V3.1)   | Variant 1 only climate change (V1) | Variant 2 - low retention more ponds - cereals (V2.1) |
| Season           | Sediment yield [t/ha] - subbasin 9  |                                                            |                                                            |                                    |                                                       |                                                            | Sediment yield [t/ha] - subbasin 10 |                                                       |                                                            |                                    |                                                       |
| DJF              | 0.16                                | 0.13<br>-16.30%                                            | 0.16<br>+0.40%                                             | 0.19                               | 0.16<br>-16.24%                                       | 0.19<br>+0.53%                                             | 0.20                                | 0.17<br>-15.70%                                       | 0.20<br>-0.02%                                             | 0.27                               | 0.23<br>-15.72%                                       |
| MAM              | 0.13                                | 0.11<br>-16.59%                                            | 0.13<br>+0.63%                                             | 0.18                               | 0.15<br>-16.47%                                       | 0.18<br>+0.53%                                             | 0.18                                | 0.15<br>-16.05%                                       | 0.18<br>0.00%                                              | 0.25                               | 0.21<br>-15.98%                                       |
| JJA              | 0.13                                | 0.11<br>-16.55%                                            | 0.13<br>+0.76%                                             | 0.20                               | 0.17<br>-16.49%                                       | 0.21<br>+0.54%                                             | 0.21                                | 0.17<br>-16.01%                                       | 0.21<br>0.00%                                              | 0.30                               | 0.25<br>-16.07%                                       |
| SON              | 0.22                                | 0.19<br>-16.46%                                            | 0.22<br>+0.56%                                             | 0.30                               | 0.25<br>-16.51%                                       | 0.30<br>+0.50%                                             | 0.28                                | 0.24<br>-16.03%                                       | 0.28<br>-0.01%                                             | 0.45                               | 0.38<br>-16.10%                                       |
| Total annual     | 0.64                                | 0.53<br>-16.47%                                            | 0.64<br>+0.57%                                             | 0.88                               | 0.73<br>-16.44%                                       | 0.88<br>+0.52%                                             | 0.87                                | 0.73<br>-15.95%                                       | 0.87<br>-0.01%                                             | 1.27                               | 1.07<br>-15.99%                                       |
| Climate scenario |                                     | RCP 4.5                                                    |                                                            |                                    |                                                       |                                                            | RCP 8.5                             |                                                       |                                                            |                                    |                                                       |
| Time interval    |                                     | 2041-2050                                                  |                                                            |                                    |                                                       |                                                            | 2041-2050                           |                                                       |                                                            |                                    |                                                       |
| Type of scenario | Variant 1 only climate change (V1)  | Variant 2 - low retention more ponds cereals (V2.1)        | Variant 3 - low retention more reservoirs cereals (V3.1)   | Variant 1 only climate change (V1) | Variant 2 - low retention more ponds - cereals (V2.1) | Variant 3 - low retention more reservoirs - cereals (V3.1) | Variant 1 only climate change (V1)  | Variant 2 - low retention more ponds cereals (V2.1)   | Variant 3 - low retention more reservoirs cereals (V3.1)   | Variant 1 only climate change (V1) | Variant 2 - low retention more ponds - cereals (V2.1) |
| Season           | Sediment yield [t/ha] - subbasin 22 |                                                            |                                                            |                                    |                                                       |                                                            | Sediment yield [t/ha] - subbasin 31 |                                                       |                                                            |                                    |                                                       |
| DJF              | 0.12                                | 0.10<br>-16.64%                                            | 0.12<br>-1.63%                                             | 0.16                               | 0.14<br>-16.62%                                       | 0.16<br>-1.72%                                             | 0.00                                | 0.00<br>-3.57%                                        | 0.00<br>0.00%                                              | 0.01                               | 0.01<br>-5.34%                                        |
| MAM              | 0.14                                | 0.12<br>-16.89%                                            | 0.14<br>-1.68%                                             | 0.16                               | 0.14<br>-16.81%                                       | 0.16<br>-1.72%                                             | 0.00                                | 0.00<br>-20.65%                                       | 0.00<br>0.00%                                              | 0.00                               | 0.00<br>-21.85%                                       |
| JJA              | 0.15                                | 0.12<br>-16.98%                                            | 0.15<br>-1.80%                                             | 0.21                               | 0.18<br>-17.01%                                       | 0.21<br>-1.83%                                             | 0.00                                | 0.00<br>-18.18%                                       | 0.00<br>0.00%                                              | 0.00                               | 0.00<br>-18.67%                                       |
| SON              | 0.22                                | 0.18<br>-16.96%                                            | 0.21<br>-1.67%                                             | 0.49                               | 0.40<br>-16.97%                                       | 0.48<br>-1.73%                                             | 0.00                                | 0.00<br>0.00%                                         | 0.00<br>0.00%                                              | 0.00                               | 0.00<br>-20.00%                                       |
| Total annual     | 0.63                                | 0.52<br>-16.89%                                            | 0.62<br>-1.69%                                             | 1.03                               | 0.85<br>-16.90%                                       | 1.01<br>-1.75%                                             | 0.01                                | 0.01<br>-11.95%                                       | 0.01<br>0.00%                                              | 0.02                               | 0.02<br>-13.65%                                       |

**Table S17.** Summary of the average: actual evapotranspiration (mm), soil water content (mm), total runoff (mm) and sediment yield (t/ha) for the entire Bystra catchment by season between Variant 1 (V1 - BaU) and Variants 2.1 and 3.1 for the years 2041-2050 for climate scenarios RCP 4.5 and RCP 8.5. Bold numbers indicate the corresponding value and shaded numbers indicate the percentage change. Shade of red indicates % decrease in content and shade of blue indicates % increase in content (author's own elaboration).

| Climate scenario |                                    | RCP 4.5                                             |                                                          |       |                                    | RCP 8.5                                               |                                                            |       |  |
|------------------|------------------------------------|-----------------------------------------------------|----------------------------------------------------------|-------|------------------------------------|-------------------------------------------------------|------------------------------------------------------------|-------|--|
| Time interval    |                                    | 2041-2050                                           |                                                          |       |                                    |                                                       |                                                            |       |  |
| Type of scenario | Variant 1 only climate change (V1) | Variant 2 - low retention more ponds cereals (V2.1) | Variant 3 - low retention more reservoirs cereals (V3.1) |       | Variant 1 only climate change (V1) | Variant 2 - low retention more ponds - cereals (V2.1) | Variant 3 - low retention more reservoirs - cereals (V3.1) |       |  |
|                  |                                    |                                                     |                                                          |       |                                    |                                                       |                                                            |       |  |
|                  |                                    |                                                     |                                                          |       |                                    |                                                       |                                                            |       |  |
| Season           |                                    | Actual evapotranspiration [mm] - entire catchment   |                                                          |       |                                    |                                                       |                                                            |       |  |
| DJF              | 27.4                               | 27.4                                                | 27.4                                                     | 28.9  | 28.8                               | 28.9                                                  | 28.9                                                       | 28.9  |  |
|                  |                                    | -0.13%                                              | 0.00%                                                    |       | -0.12%                             | 0.00%                                                 |                                                            |       |  |
| MAM              | 146.2                              | 145.9                                               | 146.2                                                    | 144.1 | 143.8                              | 144.1                                                 | 144.1                                                      | 144.1 |  |
|                  |                                    | -0.25%                                              | -0.01%                                                   |       | -0.21%                             | -0.01%                                                |                                                            |       |  |
| JJA              | 161.8                              | 162.5                                               | 161.8                                                    | 158.4 | 159.0                              | 158.4                                                 | 158.4                                                      | 158.4 |  |
|                  |                                    | +0.43%                                              | +0.01%                                                   |       | +0.41%                             | +0.01%                                                |                                                            |       |  |
| SON              | 66.7                               | 66.8                                                | 66.7                                                     | 69.3  | 69.4                               | 69.3                                                  | 69.3                                                       | 69.3  |  |
|                  |                                    | +0.11%                                              | 0.00%                                                    |       | +0.09%                             | 0.00%                                                 |                                                            |       |  |
| Total annual     | 402.2                              | 402.6                                               | 402.2                                                    | 400.7 | 401.0                              | 400.7                                                 | 400.7                                                      | 400.7 |  |
|                  |                                    | +0.10%                                              | 0.00%                                                    |       | +0.10%                             | 0.00%                                                 |                                                            |       |  |

| Climate scenario |                                    | RCP 4.5                                             |                                                          |       |                                    | RCP 8.5                                               |                                                            |       |  |
|------------------|------------------------------------|-----------------------------------------------------|----------------------------------------------------------|-------|------------------------------------|-------------------------------------------------------|------------------------------------------------------------|-------|--|
| Time interval    |                                    | 2041-2050                                           |                                                          |       |                                    |                                                       |                                                            |       |  |
| Type of scenario | Variant 1 only climate change (V1) | Variant 2 - low retention more ponds cereals (V2.1) | Variant 3 - low retention more reservoirs cereals (V3.1) |       | Variant 1 only climate change (V1) | Variant 2 - low retention more ponds - cereals (V2.1) | Variant 3 - low retention more reservoirs - cereals (V3.1) |       |  |
|                  |                                    |                                                     |                                                          |       |                                    |                                                       |                                                            |       |  |
|                  |                                    |                                                     |                                                          |       |                                    |                                                       |                                                            |       |  |
| Season           |                                    | Soil water content [mm] - entire catchment          |                                                          |       |                                    |                                                       |                                                            |       |  |
| DJF              | 335.2                              | 334.8                                               | 335.2                                                    | 340.5 | 340.3                              | 340.5                                                 | 340.5                                                      | 340.5 |  |
|                  |                                    | -0.11%                                              | -0.01%                                                   |       | -0.06%                             | 0.00%                                                 |                                                            |       |  |
| MAM              | 310.5                              | 310.4                                               | 310.4                                                    | 320.0 | 319.9                              | 320.0                                                 | 320.0                                                      | 320.0 |  |
|                  |                                    | -0.03%                                              | -0.01%                                                   |       | -0.02%                             | 0.00%                                                 |                                                            |       |  |
| JJA              | 295.4                              | 295.0                                               | 295.4                                                    | 308.4 | 308.0                              | 308.4                                                 | 308.4                                                      | 308.4 |  |
|                  |                                    | -0.15%                                              | -0.01%                                                   |       | -0.13%                             | -0.01%                                                |                                                            |       |  |
| SON              | 318.7                              | 318.2                                               | 318.7                                                    | 328.0 | 327.7                              | 328.0                                                 | 328.0                                                      | 328.0 |  |
|                  |                                    | -0.17%                                              | -0.01%                                                   |       | -0.12%                             | -0.01%                                                |                                                            |       |  |
| Average annual   | 314.9                              | 314.6                                               | 314.9                                                    | 324.2 | 324.0                              | 324.2                                                 | 324.2                                                      | 324.2 |  |
|                  |                                    | -0.12%                                              | -0.01%                                                   |       | -0.08%                             | -0.01%                                                |                                                            |       |  |

| Climate scenario |                                    | RCP 4.5                                             |                                                          |       |                                    | RCP 8.5                                               |                                                            |       |  |
|------------------|------------------------------------|-----------------------------------------------------|----------------------------------------------------------|-------|------------------------------------|-------------------------------------------------------|------------------------------------------------------------|-------|--|
| Time interval    |                                    | 2041-2050                                           |                                                          |       |                                    |                                                       |                                                            |       |  |
| Type of scenario | Variant 1 only climate change (V1) | Variant 2 - low retention more ponds cereals (V2.1) | Variant 3 - low retention more reservoirs cereals (V3.1) |       | Variant 1 only climate change (V1) | Variant 2 - low retention more ponds - cereals (V2.1) | Variant 3 - low retention more reservoirs - cereals (V3.1) |       |  |
|                  |                                    |                                                     |                                                          |       |                                    |                                                       |                                                            |       |  |
|                  |                                    |                                                     |                                                          |       |                                    |                                                       |                                                            |       |  |
| Season           |                                    | Total runoff [mm] - entire catchment                |                                                          |       |                                    |                                                       |                                                            |       |  |
| DJF              | 41.6                               | 41.2                                                | 41.6                                                     | 59.1  | 58.6                               | 59.1                                                  | 59.1                                                       | 59.1  |  |
|                  |                                    | -0.96%                                              | -0.01%                                                   |       | -0.89%                             | -0.01%                                                |                                                            |       |  |
| MAM              | 41.5                               | 41.1                                                | 41.5                                                     | 58.6  | 58.1                               | 58.6                                                  | 58.6                                                       | 58.6  |  |
|                  |                                    | -0.99%                                              | -0.01%                                                   |       | -0.88%                             | -0.01%                                                |                                                            |       |  |
| JJA              | 35.0                               | 34.7                                                | 35.0                                                     | 53.9  | 53.5                               | 53.9                                                  | 53.9                                                       | 53.9  |  |
|                  |                                    | -0.96%                                              | -0.01%                                                   |       | -0.80%                             | -0.01%                                                |                                                            |       |  |
| SON              | 37.5                               | 37.1                                                | 37.5                                                     | 56.5  | 55.9                               | 56.5                                                  | 56.5                                                       | 56.5  |  |
|                  |                                    | -1.02%                                              | -0.02%                                                   |       | -0.94%                             | -0.01%                                                |                                                            |       |  |
| Total annual     | 155.6                              | 154.1                                               | 155.6                                                    | 228.1 | 226.1                              | 228.1                                                 | 228.1                                                      | 228.1 |  |
|                  |                                    | -0.98%                                              | -0.01%                                                   |       | -0.88%                             | -0.01%                                                |                                                            |       |  |

| Climate scenario |                                    | RCP 4.5                                             |                                                          |      |                                    | RCP 8.5                                               |                                                            |      |  |
|------------------|------------------------------------|-----------------------------------------------------|----------------------------------------------------------|------|------------------------------------|-------------------------------------------------------|------------------------------------------------------------|------|--|
| Time interval    |                                    | 2041-2050                                           |                                                          |      |                                    |                                                       |                                                            |      |  |
| Type of scenario | Variant 1 only climate change (V1) | Variant 2 - low retention more ponds cereals (V2.1) | Variant 3 - low retention more reservoirs cereals (V3.1) |      | Variant 1 only climate change (V1) | Variant 2 - low retention more ponds - cereals (V2.1) | Variant 3 - low retention more reservoirs - cereals (V3.1) |      |  |
|                  |                                    |                                                     |                                                          |      |                                    |                                                       |                                                            |      |  |
|                  |                                    |                                                     |                                                          |      |                                    |                                                       |                                                            |      |  |
| Season           |                                    | Sediment yield [t/ha] - entire catchment            |                                                          |      |                                    |                                                       |                                                            |      |  |
| DJF              | 0.13                               | 0.11                                                | 0.13                                                     | 0.17 | 0.14                               | 0.17                                                  | 0.17                                                       | 0.17 |  |
|                  |                                    | -17.78%                                             | 0.00%                                                    |      | -17.91%                            | 0.00%                                                 |                                                            |      |  |
| MAM              | 0.12                               | 0.10                                                | 0.12                                                     | 0.16 | 0.13                               | 0.16                                                  | 0.16                                                       | 0.16 |  |
|                  |                                    | -18.59%                                             | 0.00%                                                    |      | -18.05%                            | -0.21%                                                |                                                            |      |  |
| JJA              | 0.13                               | 0.10                                                | 0.13                                                     | 0.19 | 0.15                               | 0.19                                                  | 0.19                                                       | 0.19 |  |
|                  |                                    | -19.27%                                             | 0.00%                                                    |      | -18.80%                            | 0.00%                                                 |                                                            |      |  |
| SON              | 0.18                               | 0.15                                                | 0.18                                                     | 0.32 | 0.26                               | 0.32                                                  | 0.32                                                       | 0.32 |  |
|                  |                                    | -17.74%                                             | 0.00%                                                    |      | -18.40%                            | -0.10%                                                |                                                            |      |  |
| Total annual     | 0.56                               | 0.45                                                | 0.56                                                     | 0.84 | 0.68                               | 0.84                                                  | 0.84                                                       | 0.84 |  |
|                  |                                    | -18.29%                                             | 0.00%                                                    |      | -18.33%                            | -0.08%                                                |                                                            |      |  |
